# Supplementary material for: Iridium complexes bearing a PNP ligand, favoring facile C(sp3)–H bond cleavage
Source: Royal Society of Chemistry journal article supplement (doi:10.1039/c1dt10577a), 2011-01-01
Supplement: c1dt10577a.pdf [file c1dt10577a.pdf]

Electronic Supplementary Information for Dalton Transactions  
This journal is © The Royal Society of Chemistry 2011

## **Iridium Complexes Bearing a PNP Ligand, Favoring Facile C(sp<sup>3</sup>)-H Bond Cleavage**

**Kapil S. Lokare,<sup>\*a</sup> Robert J. Nielsen,<sup>\*b</sup> Muhammed Yousufuddin,<sup>c</sup> William A. Goddard III,<sup>b</sup> and Roy A. Periana<sup>\*a</sup>**

<sup>a</sup> Scripps Energy Laboratories, The Scripps Research Institute, Scripps Florida, Jupiter, FL 33458

<sup>b</sup> Materials and Process Simulation Center, Beckman Institute, Division of Chemistry and Chemical Engineering, California Institute of Technology, Pasadena, California 91125.

<sup>c</sup> Center for Nanostructured Materials, University of Texas at Arlington, Arlington, Texas, USA 76019.

|                                                                              |           |
|------------------------------------------------------------------------------|-----------|
| <b>A. General Considerations for X-Ray Crystallography.....</b>              | <b>2</b>  |
| <b>B. X-ray Diffraction Data for Ir(PNP)(Cl)<sub>3</sub> (2).....</b>        | <b>3</b>  |
| <b>C. X-ray Diffraction Data for Ir(PNP)<sup>*</sup>(I)<sub>2</sub>.....</b> | <b>25</b> |
| <b>D. Computational Details.....</b>                                         | <b>37</b> |

Electronic Supplementary Information for Dalton Transactions  
This journal is © The Royal Society of Chemistry 2011

### **A. General Considerations for X-Ray Crystallography**

Diffraction data for the complexes were collected at low temperature ( $T = 100$  K) on a Bruker SMART APEX CCD diffractometer with graphite-monochromated Mo  $K\alpha$  radiation ( $\lambda = 0.71073$  Å). The cell parameters for the Ir complexes were obtained from the least-squares refinement of the spots (from 60 collected frames) using the SMART program. A hemisphere of the crystal data was collected and the intensity data was processed using the Saint Plus program. All calculations for structure determination were carried out using the SHELXTL package (version 5.1). 2 Initial atomic positions were located by direct methods using XS, and the structure was refined by least-squares methods using SHELX. Absorption corrections were applied by using SADABS.<sup>3</sup> Calculated hydrogen positions were input and refined in a riding manner along with the attached carbons.<sup>1</sup>

### **B. X-Ray Diffraction Data for Ir(PNP)(Cl)<sub>3</sub> (2).**

Electronic Supplementary Information for Dalton Transactions  
This journal is © The Royal Society of Chemistry 2011

Table 1. Crystal data and structure refinement for C<sub>46</sub>H<sub>86</sub>Cl<sub>6</sub>Ir<sub>2</sub>N<sub>2</sub>P<sub>4</sub> \* C<sub>1</sub>H<sub>2</sub>Cl<sub>2</sub>.

|                                   |                                                                                               |                  |
|-----------------------------------|-----------------------------------------------------------------------------------------------|------------------|
| Identification code               | perianam                                                                                      |                  |
| Empirical formula                 | C <sub>47</sub> H <sub>88</sub> Cl <sub>8</sub> Ir <sub>2</sub> N <sub>2</sub> P <sub>4</sub> |                  |
| Formula weight                    | 1473.07                                                                                       |                  |
| Temperature                       | 100(2) K                                                                                      |                  |
| Wavelength                        | 0.71073 Å                                                                                     |                  |
| Crystal system                    | Triclinic                                                                                     |                  |
| Space group                       | P-1                                                                                           |                  |
| Unit cell dimensions              | a = 13.2633(14) Å                                                                             | α = 106.729(2)°. |
|                                   | b = 14.7326(16) Å                                                                             | β = 95.934(2)°.  |
|                                   | c = 17.4332(18) Å                                                                             | γ = 112.653(2)°. |
| Volume                            | 2920.8(5) Å <sup>3</sup>                                                                      |                  |
| Z                                 | 2                                                                                             |                  |
| Density (calculated)              | 1.675 Mg/m <sup>3</sup>                                                                       |                  |
| Absorption coefficient            | 5.060 mm <sup>-1</sup>                                                                        |                  |
| F(000)                            | 1468                                                                                          |                  |
| Crystal size                      | 0.16 x 0.05 x 0.02 mm <sup>3</sup>                                                            |                  |
| Theta range for data collection   | 1.26 to 28.34°.                                                                               |                  |
| Index ranges                      | -17 ≤ h ≤ 16, -19 ≤ k ≤ 19, -16 ≤ l ≤ 22                                                      |                  |
| Reflections collected             | 19155                                                                                         |                  |
| Independent reflections           | 13373 [R(int) = 0.0254]                                                                       |                  |
| Completeness to theta = 28.34°    | 91.6 %                                                                                        |                  |
| Absorption correction             | Semi-empirical from equivalents                                                               |                  |
| Max. and min. transmission        | 0.745 and 0.581                                                                               |                  |
| Refinement method                 | Full-matrix least-squares on F <sup>2</sup>                                                   |                  |
| Data / restraints / parameters    | 13373 / 6 / 592                                                                               |                  |
| Goodness-of-fit on F <sup>2</sup> | 1.070                                                                                         |                  |
| Final R indices [I > 2σ(I)]       | R1 = 0.0448, wR2 = 0.1169                                                                     |                  |
| R indices (all data)              | R1 = 0.0544, wR2 = 0.1283                                                                     |                  |
| Largest diff. peak and hole       | 4.786 and -1.897 e.Å <sup>-3</sup>                                                            |                  |

Electronic Supplementary Information for Dalton Transactions  
This journal is © The Royal Society of Chemistry 2011

Table 2. Atomic coordinates ( $\times 10^4$ ) and equivalent isotropic displacement parameters ( $\text{\AA}^2 \times 10^3$ ) for C<sub>46</sub>H<sub>86</sub>Cl<sub>6</sub>Ir<sub>2</sub>N<sub>2</sub>P<sub>4</sub>\*C<sub>1</sub>H<sub>2</sub>Cl<sub>2</sub>. U(eq) is defined as one third of the trace of the orthogonalized  $U^{ij}$  tensor.

|       | x       | y       | z       | U(eq) |
|-------|---------|---------|---------|-------|
| Ir(1) | 6403(1) | 3407(1) | 3431(1) | 14(1) |
| Cl(1) | 4757(1) | 3673(1) | 3459(1) | 20(1) |
| Cl(2) | 5320(1) | 1553(1) | 2854(1) | 21(1) |
| Cl(3) | 8100(1) | 3224(1) | 3449(1) | 19(1) |
| P(1)  | 6570(1) | 3634(1) | 4869(1) | 15(1) |
| P(2)  | 6494(1) | 3678(1) | 2155(1) | 17(1) |
| N(1)  | 7307(4) | 5014(4) | 3898(3) | 16(1) |
| C(1)  | 7945(5) | 3925(5) | 5573(4) | 19(1) |
| C(2)  | 8883(5) | 4879(5) | 5490(4) | 23(1) |
| C(3)  | 7937(6) | 4228(5) | 6481(4) | 23(1) |
| C(4)  | 8256(5) | 3002(5) | 5327(4) | 23(1) |
| C(5)  | 5367(5) | 2818(5) | 5233(4) | 21(1) |
| C(6)  | 5561(6) | 1894(5) | 5332(4) | 25(1) |
| C(7)  | 5223(5) | 3479(5) | 6039(4) | 25(1) |
| C(8)  | 4237(6) | 2319(6) | 4591(4) | 32(2) |
| C(9)  | 6615(5) | 4970(4) | 5149(3) | 17(1) |
| C(10) | 7294(5) | 5570(5) | 4661(4) | 18(1) |
| C(11) | 7862(5) | 6647(5) | 4977(4) | 23(1) |
| C(12) | 8485(5) | 7172(5) | 4518(4) | 22(1) |
| C(13) | 8500(5) | 6594(5) | 3741(4) | 22(1) |
| C(14) | 7902(5) | 5494(5) | 3439(4) | 18(1) |
| C(15) | 7862(5) | 4850(4) | 2582(3) | 18(1) |
| C(16) | 6666(5) | 2725(5) | 1244(3) | 22(1) |
| C(17) | 7214(6) | 2071(5) | 1530(4) | 28(1) |
| C(18) | 7432(6) | 3315(6) | 761(4)  | 30(2) |
| C(19) | 5504(6) | 1911(5) | 690(4)  | 28(1) |
| C(20) | 5516(5) | 4170(5) | 1734(4) | 19(1) |
| C(21) | 5686(5) | 5207(5) | 2405(4) | 23(1) |
| C(22) | 5766(6) | 4460(5) | 981(4)  | 25(1) |
| C(23) | 4280(5) | 3346(5) | 1517(4) | 23(1) |
| Ir(2) | 9414(1) | 8953(1) | 2170(1) | 14(1) |

Electronic Supplementary Information for Dalton Transactions  
This journal is © The Royal Society of Chemistry 2011

|       |          |          |         |       |
|-------|----------|----------|---------|-------|
| Cl(4) | 8711(1)  | 8733(1)  | 794(1)  | 20(1) |
| Cl(5) | 8542(1)  | 7094(1)  | 1816(1) | 21(1) |
| Cl(6) | 10119(1) | 9229(1)  | 3567(1) | 20(1) |
| P(3)  | 11207(1) | 9097(1)  | 1931(1) | 16(1) |
| P(4)  | 7865(1)  | 9324(1)  | 2492(1) | 16(1) |
| N(2)  | 10183(4) | 10547(4) | 2438(3) | 17(1) |
| C(24) | 11871(5) | 8283(5)  | 2242(4) | 23(1) |
| C(25) | 11400(6) | 7900(6)  | 2893(4) | 27(1) |
| C(26) | 11632(6) | 7317(5)  | 1489(4) | 31(2) |
| C(27) | 13160(5) | 8927(5)  | 2620(4) | 28(1) |
| C(28) | 11583(5) | 9283(5)  | 946(4)  | 19(1) |
| C(29) | 10843(6) | 8320(5)  | 183(4)  | 30(2) |
| C(30) | 12831(5) | 9546(5)  | 952(4)  | 25(1) |
| C(31) | 11411(5) | 10225(5) | 858(4)  | 24(1) |
| C(32) | 11975(5) | 10439(5) | 2696(3) | 19(1) |
| C(33) | 11319(5) | 11059(5) | 2648(3) | 20(1) |
| C(34) | 11851(5) | 12119(5) | 2772(4) | 24(1) |
| C(35) | 11211(6) | 12666(5) | 2685(4) | 26(1) |
| C(36) | 10055(6) | 12137(5) | 2503(4) | 27(1) |
| C(37) | 9544(5)  | 11069(5) | 2367(3) | 19(1) |
| C(38) | 8281(5)  | 10470(4) | 2158(4) | 19(1) |
| C(39) | 6352(5)  | 8418(4)  | 1892(3) | 17(1) |
| C(40) | 6284(5)  | 7645(5)  | 1062(4) | 25(1) |
| C(41) | 5731(5)  | 9046(5)  | 1713(4) | 26(1) |
| C(42) | 5761(5)  | 7763(5)  | 2381(4) | 24(1) |
| C(43) | 7859(5)  | 9928(5)  | 3610(4) | 20(1) |
| C(44) | 7755(5)  | 9167(5)  | 4064(4) | 24(1) |
| C(45) | 6936(5)  | 10295(5) | 3722(4) | 23(1) |
| C(46) | 8995(5)  | 10929(5) | 4037(4) | 24(1) |
| C(47) | 8166(7)  | 5954(7)  | 9527(6) | 54(2) |
| Cl(7) | 8931(3)  | 5768(2)  | 8778(2) | 94(1) |
| Cl(8) | 6858(2)  | 4816(2)  | 9231(1) | 49(1) |

---

Electronic Supplementary Information for Dalton Transactions  
This journal is © The Royal Society of Chemistry 2011

Table 3. Bond lengths [Å] and angles [°] for C46 H86 Cl6 Ir2 N2 P4 \* C1 H2 Cl2.

---

|             |            |
|-------------|------------|
| Ir(1)-N(1)  | 2.052(5)   |
| Ir(1)-Cl(1) | 2.3643(14) |
| Ir(1)-Cl(3) | 2.3666(14) |
| Ir(1)-Cl(2) | 2.3735(14) |
| Ir(1)-P(2)  | 2.3775(15) |
| Ir(1)-P(1)  | 2.4049(15) |
| P(1)-C(9)   | 1.862(6)   |
| P(1)-C(5)   | 1.889(6)   |
| P(1)-C(1)   | 1.910(6)   |
| P(2)-C(15)  | 1.842(6)   |
| P(2)-C(16)  | 1.893(6)   |
| P(2)-C(20)  | 1.893(6)   |
| N(1)-C(14)  | 1.337(7)   |
| N(1)-C(10)  | 1.353(7)   |
| C(1)-C(3)   | 1.519(8)   |
| C(1)-C(4)   | 1.528(8)   |
| C(1)-C(2)   | 1.534(8)   |
| C(2)-H(2A)  | 0.9800     |
| C(2)-H(2B)  | 0.9800     |
| C(2)-H(2C)  | 0.9800     |
| C(3)-H(3A)  | 0.9800     |
| C(3)-H(3B)  | 0.9800     |
| C(3)-H(3C)  | 0.9800     |
| C(4)-H(4A)  | 0.9800     |
| C(4)-H(4B)  | 0.9800     |
| C(4)-H(4C)  | 0.9800     |
| C(5)-C(6)   | 1.531(9)   |
| C(5)-C(8)   | 1.539(9)   |
| C(5)-C(7)   | 1.540(8)   |
| C(6)-H(6A)  | 0.9800     |
| C(6)-H(6B)  | 0.9800     |
| C(6)-H(6C)  | 0.9800     |
| C(7)-H(7A)  | 0.9800     |
| C(7)-H(7B)  | 0.9800     |

Electronic Supplementary Information for Dalton Transactions  
This journal is © The Royal Society of Chemistry 2011

|              |          |
|--------------|----------|
| C(7)-H(7C)   | 0.9800   |
| C(8)-H(8A)   | 0.9800   |
| C(8)-H(8B)   | 0.9800   |
| C(8)-H(8C)   | 0.9800   |
| C(9)-C(10)   | 1.513(8) |
| C(9)-H(9A)   | 0.9900   |
| C(9)-H(9B)   | 0.9900   |
| C(10)-C(11)  | 1.371(8) |
| C(11)-C(12)  | 1.387(8) |
| C(11)-H(11)  | 0.9500   |
| C(12)-C(13)  | 1.383(8) |
| C(12)-H(12)  | 0.9500   |
| C(13)-C(14)  | 1.402(8) |
| C(13)-H(13)  | 0.9500   |
| C(14)-C(15)  | 1.505(8) |
| C(15)-H(15A) | 0.9900   |
| C(15)-H(15B) | 0.9900   |
| C(16)-C(19)  | 1.532(9) |
| C(16)-C(18)  | 1.554(9) |
| C(16)-C(17)  | 1.564(8) |
| C(17)-H(17A) | 0.9800   |
| C(17)-H(17B) | 0.9800   |
| C(17)-H(17C) | 0.9800   |
| C(18)-H(18A) | 0.9800   |
| C(18)-H(18B) | 0.9800   |
| C(18)-H(18C) | 0.9800   |
| C(19)-H(19A) | 0.9800   |
| C(19)-H(19B) | 0.9800   |
| C(19)-H(19C) | 0.9800   |
| C(20)-C(22)  | 1.523(8) |
| C(20)-C(23)  | 1.542(8) |
| C(20)-C(21)  | 1.550(8) |
| C(21)-H(21A) | 0.9800   |
| C(21)-H(21B) | 0.9800   |
| C(21)-H(21C) | 0.9800   |
| C(22)-H(22A) | 0.9800   |

Electronic Supplementary Information for Dalton Transactions  
This journal is © The Royal Society of Chemistry 2011

|              |            |
|--------------|------------|
| C(22)-H(22B) | 0.9800     |
| C(22)-H(22C) | 0.9800     |
| C(23)-H(23A) | 0.9800     |
| C(23)-H(23B) | 0.9800     |
| C(23)-H(23C) | 0.9800     |
| Ir(2)-N(2)   | 2.049(5)   |
| Ir(2)-Cl(4)  | 2.3640(14) |
| Ir(2)-Cl(6)  | 2.3744(14) |
| Ir(2)-Cl(5)  | 2.3781(14) |
| Ir(2)-P(3)   | 2.3971(15) |
| Ir(2)-P(4)   | 2.3995(15) |
| P(3)-C(32)   | 1.838(6)   |
| P(3)-C(24)   | 1.896(6)   |
| P(3)-C(28)   | 1.901(6)   |
| P(4)-C(38)   | 1.847(6)   |
| P(4)-C(39)   | 1.897(6)   |
| P(4)-C(43)   | 1.899(6)   |
| N(2)-C(33)   | 1.351(8)   |
| N(2)-C(37)   | 1.364(7)   |
| C(24)-C(25)  | 1.497(9)   |
| C(24)-C(26)  | 1.530(9)   |
| C(24)-C(27)  | 1.554(9)   |
| C(25)-H(25A) | 0.9800     |
| C(25)-H(25B) | 0.9800     |
| C(25)-H(25C) | 0.9800     |
| C(26)-H(26A) | 0.9800     |
| C(26)-H(26B) | 0.9800     |
| C(26)-H(26C) | 0.9800     |
| C(27)-H(27A) | 0.9800     |
| C(27)-H(27B) | 0.9800     |
| C(27)-H(27C) | 0.9800     |
| C(28)-C(29)  | 1.522(8)   |
| C(28)-C(31)  | 1.537(8)   |
| C(28)-C(30)  | 1.546(8)   |
| C(29)-H(29A) | 0.9800     |
| C(29)-H(29B) | 0.9800     |



Electronic Supplementary Information for Dalton Transactions  
This journal is © The Royal Society of Chemistry 2011

|              |          |
|--------------|----------|
| C(29)-H(29C) | 0.9800   |
| C(30)-H(30A) | 0.9800   |
| C(30)-H(30B) | 0.9800   |
| C(30)-H(30C) | 0.9800   |
| C(31)-H(31A) | 0.9800   |
| C(31)-H(31B) | 0.9800   |
| C(31)-H(31C) | 0.9800   |
| C(32)-C(33)  | 1.496(8) |
| C(32)-H(32A) | 0.9900   |
| C(32)-H(32B) | 0.9900   |
| C(33)-C(34)  | 1.382(9) |
| C(34)-C(35)  | 1.400(9) |
| C(34)-H(34)  | 0.9500   |
| C(35)-C(36)  | 1.377(9) |
| C(35)-H(35)  | 0.9500   |
| C(36)-C(37)  | 1.387(9) |
| C(36)-H(36)  | 0.9500   |
| C(37)-C(38)  | 1.506(8) |
| C(38)-H(38A) | 0.9900   |
| C(38)-H(38B) | 0.9900   |
| C(39)-C(42)  | 1.517(8) |
| C(39)-C(41)  | 1.527(8) |
| C(39)-C(40)  | 1.531(8) |
| C(40)-H(40A) | 0.9800   |
| C(40)-H(40B) | 0.9800   |
| C(40)-H(40C) | 0.9800   |
| C(41)-H(41A) | 0.9800   |
| C(41)-H(41B) | 0.9800   |
| C(41)-H(41C) | 0.9800   |
| C(42)-H(42A) | 0.9800   |
| C(42)-H(42B) | 0.9800   |
| C(42)-H(42C) | 0.9800   |
| C(43)-C(44)  | 1.522(9) |
| C(43)-C(45)  | 1.525(8) |
| C(43)-C(46)  | 1.556(8) |
| C(44)-H(44A) | 0.9800   |

Electronic Supplementary Information for Dalton Transactions  
This journal is © The Royal Society of Chemistry 2011

|                   |            |
|-------------------|------------|
| C(44)-H(44B)      | 0.9800     |
| C(44)-H(44C)      | 0.9800     |
| C(45)-H(45A)      | 0.9800     |
| C(45)-H(45B)      | 0.9800     |
| C(45)-H(45C)      | 0.9800     |
| C(46)-H(46A)      | 0.9800     |
| C(46)-H(46B)      | 0.9800     |
| C(46)-H(46C)      | 0.9800     |
| C(47)-Cl(7)       | 1.759(9)   |
| C(47)-Cl(8)       | 1.778(8)   |
| C(47)-H(47A)      | 0.9900     |
| C(47)-H(47B)      | 0.9900     |
|                   |            |
| N(1)-Ir(1)-Cl(1)  | 87.50(13)  |
| N(1)-Ir(1)-Cl(3)  | 89.91(13)  |
| Cl(1)-Ir(1)-Cl(3) | 177.26(5)  |
| N(1)-Ir(1)-Cl(2)  | 178.06(14) |
| Cl(1)-Ir(1)-Cl(2) | 91.36(5)   |
| Cl(3)-Ir(1)-Cl(2) | 91.26(5)   |
| N(1)-Ir(1)-P(2)   | 82.04(14)  |
| Cl(1)-Ir(1)-P(2)  | 91.56(5)   |
| Cl(3)-Ir(1)-P(2)  | 88.95(5)   |
| Cl(2)-Ir(1)-P(2)  | 96.42(5)   |
| N(1)-Ir(1)-P(1)   | 82.72(14)  |
| Cl(1)-Ir(1)-P(1)  | 87.06(5)   |
| Cl(3)-Ir(1)-P(1)  | 91.74(5)   |
| Cl(2)-Ir(1)-P(1)  | 98.80(5)   |
| P(2)-Ir(1)-P(1)   | 164.74(5)  |
| C(9)-P(1)-C(5)    | 107.0(3)   |
| C(9)-P(1)-C(1)    | 101.3(3)   |
| C(5)-P(1)-C(1)    | 107.9(3)   |
| C(9)-P(1)-Ir(1)   | 92.92(18)  |
| C(5)-P(1)-Ir(1)   | 121.12(19) |
| C(1)-P(1)-Ir(1)   | 121.88(19) |
| C(15)-P(2)-C(16)  | 106.5(3)   |
| C(15)-P(2)-C(20)  | 104.0(3)   |

Electronic Supplementary Information for Dalton Transactions  
This journal is © The Royal Society of Chemistry 2011

|                  |           |
|------------------|-----------|
| C(16)-P(2)-C(20) | 107.4(3)  |
| C(15)-P(2)-Ir(1) | 94.25(19) |
| C(16)-P(2)-Ir(1) | 122.0(2)  |
| C(20)-P(2)-Ir(1) | 119.2(2)  |
| C(14)-N(1)-C(10) | 121.1(5)  |
| C(14)-N(1)-Ir(1) | 119.2(4)  |
| C(10)-N(1)-Ir(1) | 119.7(4)  |
| C(3)-C(1)-C(4)   | 109.1(5)  |
| C(3)-C(1)-C(2)   | 106.2(5)  |
| C(4)-C(1)-C(2)   | 108.1(5)  |
| C(3)-C(1)-P(1)   | 113.5(4)  |
| C(4)-C(1)-P(1)   | 112.0(4)  |
| C(2)-C(1)-P(1)   | 107.7(4)  |
| C(1)-C(2)-H(2A)  | 109.5     |
| C(1)-C(2)-H(2B)  | 109.5     |
| H(2A)-C(2)-H(2B) | 109.5     |
| C(1)-C(2)-H(2C)  | 109.5     |
| H(2A)-C(2)-H(2C) | 109.5     |
| H(2B)-C(2)-H(2C) | 109.5     |
| C(1)-C(3)-H(3A)  | 109.5     |
| C(1)-C(3)-H(3B)  | 109.5     |
| H(3A)-C(3)-H(3B) | 109.5     |
| C(1)-C(3)-H(3C)  | 109.5     |
| H(3A)-C(3)-H(3C) | 109.5     |
| H(3B)-C(3)-H(3C) | 109.5     |
| C(1)-C(4)-H(4A)  | 109.5     |
| C(1)-C(4)-H(4B)  | 109.5     |
| H(4A)-C(4)-H(4B) | 109.5     |
| C(1)-C(4)-H(4C)  | 109.5     |
| H(4A)-C(4)-H(4C) | 109.5     |
| H(4B)-C(4)-H(4C) | 109.5     |
| C(6)-C(5)-C(8)   | 105.7(5)  |
| C(6)-C(5)-C(7)   | 111.5(5)  |
| C(8)-C(5)-C(7)   | 106.9(5)  |
| C(6)-C(5)-P(1)   | 108.9(4)  |
| C(8)-C(5)-P(1)   | 111.8(4)  |

Electronic Supplementary Information for Dalton Transactions  
This journal is © The Royal Society of Chemistry 2011

|                   |          |
|-------------------|----------|
| C(7)-C(5)-P(1)    | 112.0(4) |
| C(5)-C(6)-H(6A)   | 109.5    |
| C(5)-C(6)-H(6B)   | 109.5    |
| H(6A)-C(6)-H(6B)  | 109.5    |
| C(5)-C(6)-H(6C)   | 109.5    |
| H(6A)-C(6)-H(6C)  | 109.5    |
| H(6B)-C(6)-H(6C)  | 109.5    |
| C(5)-C(7)-H(7A)   | 109.5    |
| C(5)-C(7)-H(7B)   | 109.5    |
| H(7A)-C(7)-H(7B)  | 109.5    |
| C(5)-C(7)-H(7C)   | 109.5    |
| H(7A)-C(7)-H(7C)  | 109.5    |
| H(7B)-C(7)-H(7C)  | 109.5    |
| C(5)-C(8)-H(8A)   | 109.5    |
| C(5)-C(8)-H(8B)   | 109.5    |
| H(8A)-C(8)-H(8B)  | 109.5    |
| C(5)-C(8)-H(8C)   | 109.5    |
| H(8A)-C(8)-H(8C)  | 109.5    |
| H(8B)-C(8)-H(8C)  | 109.5    |
| C(10)-C(9)-P(1)   | 110.6(4) |
| C(10)-C(9)-H(9A)  | 109.5    |
| P(1)-C(9)-H(9A)   | 109.5    |
| C(10)-C(9)-H(9B)  | 109.5    |
| P(1)-C(9)-H(9B)   | 109.5    |
| H(9A)-C(9)-H(9B)  | 108.1    |
| N(1)-C(10)-C(11)  | 120.8(5) |
| N(1)-C(10)-C(9)   | 118.2(5) |
| C(11)-C(10)-C(9)  | 121.0(5) |
| C(10)-C(11)-C(12) | 119.6(6) |
| C(10)-C(11)-H(11) | 120.2    |
| C(12)-C(11)-H(11) | 120.2    |
| C(13)-C(12)-C(11) | 119.0(6) |
| C(13)-C(12)-H(12) | 120.5    |
| C(11)-C(12)-H(12) | 120.5    |
| C(12)-C(13)-C(14) | 119.6(6) |
| C(12)-C(13)-H(13) | 120.2    |

Electronic Supplementary Information for Dalton Transactions  
This journal is © The Royal Society of Chemistry 2011

|                     |          |
|---------------------|----------|
| C(14)-C(13)-H(13)   | 120.2    |
| N(1)-C(14)-C(13)    | 119.8(5) |
| N(1)-C(14)-C(15)    | 119.4(5) |
| C(13)-C(14)-C(15)   | 120.7(5) |
| C(14)-C(15)-P(2)    | 109.3(4) |
| C(14)-C(15)-H(15A)  | 109.8    |
| P(2)-C(15)-H(15A)   | 109.8    |
| C(14)-C(15)-H(15B)  | 109.8    |
| P(2)-C(15)-H(15B)   | 109.8    |
| H(15A)-C(15)-H(15B) | 108.3    |
| C(19)-C(16)-C(18)   | 112.0(5) |
| C(19)-C(16)-C(17)   | 105.1(5) |
| C(18)-C(16)-C(17)   | 107.5(5) |
| C(19)-C(16)-P(2)    | 109.5(4) |
| C(18)-C(16)-P(2)    | 111.3(5) |
| C(17)-C(16)-P(2)    | 111.3(4) |
| C(16)-C(17)-H(17A)  | 109.5    |
| C(16)-C(17)-H(17B)  | 109.5    |
| H(17A)-C(17)-H(17B) | 109.5    |
| C(16)-C(17)-H(17C)  | 109.5    |
| H(17A)-C(17)-H(17C) | 109.5    |
| H(17B)-C(17)-H(17C) | 109.5    |
| C(16)-C(18)-H(18A)  | 109.5    |
| C(16)-C(18)-H(18B)  | 109.5    |
| H(18A)-C(18)-H(18B) | 109.5    |
| C(16)-C(18)-H(18C)  | 109.5    |
| H(18A)-C(18)-H(18C) | 109.5    |
| H(18B)-C(18)-H(18C) | 109.5    |
| C(16)-C(19)-H(19A)  | 109.5    |
| C(16)-C(19)-H(19B)  | 109.5    |
| H(19A)-C(19)-H(19B) | 109.5    |
| C(16)-C(19)-H(19C)  | 109.5    |
| H(19A)-C(19)-H(19C) | 109.5    |
| H(19B)-C(19)-H(19C) | 109.5    |
| C(22)-C(20)-C(23)   | 109.0(5) |
| C(22)-C(20)-C(21)   | 105.2(5) |

Electronic Supplementary Information for Dalton Transactions  
This journal is © The Royal Society of Chemistry 2011

|                     |            |
|---------------------|------------|
| C(23)-C(20)-C(21)   | 109.9(5)   |
| C(22)-C(20)-P(2)    | 114.1(4)   |
| C(23)-C(20)-P(2)    | 110.5(4)   |
| C(21)-C(20)-P(2)    | 108.0(4)   |
| C(20)-C(21)-H(21A)  | 109.5      |
| C(20)-C(21)-H(21B)  | 109.5      |
| H(21A)-C(21)-H(21B) | 109.5      |
| C(20)-C(21)-H(21C)  | 109.5      |
| H(21A)-C(21)-H(21C) | 109.5      |
| H(21B)-C(21)-H(21C) | 109.5      |
| C(20)-C(22)-H(22A)  | 109.5      |
| C(20)-C(22)-H(22B)  | 109.5      |
| H(22A)-C(22)-H(22B) | 109.5      |
| C(20)-C(22)-H(22C)  | 109.5      |
| H(22A)-C(22)-H(22C) | 109.5      |
| H(22B)-C(22)-H(22C) | 109.5      |
| C(20)-C(23)-H(23A)  | 109.5      |
| C(20)-C(23)-H(23B)  | 109.5      |
| H(23A)-C(23)-H(23B) | 109.5      |
| C(20)-C(23)-H(23C)  | 109.5      |
| H(23A)-C(23)-H(23C) | 109.5      |
| H(23B)-C(23)-H(23C) | 109.5      |
| N(2)-Ir(2)-Cl(4)    | 88.80(14)  |
| N(2)-Ir(2)-Cl(6)    | 89.57(14)  |
| Cl(4)-Ir(2)-Cl(6)   | 178.13(5)  |
| N(2)-Ir(2)-Cl(5)    | 178.00(14) |
| Cl(4)-Ir(2)-Cl(5)   | 89.72(5)   |
| Cl(6)-Ir(2)-Cl(5)   | 91.93(5)   |
| N(2)-Ir(2)-P(3)     | 82.07(14)  |
| Cl(4)-Ir(2)-P(3)    | 92.57(5)   |
| Cl(6)-Ir(2)-P(3)    | 88.11(5)   |
| Cl(5)-Ir(2)-P(3)    | 96.65(5)   |
| N(2)-Ir(2)-P(4)     | 82.05(14)  |
| Cl(4)-Ir(2)-P(4)    | 86.88(5)   |
| Cl(6)-Ir(2)-P(4)    | 91.98(5)   |
| Cl(5)-Ir(2)-P(4)    | 99.22(5)   |

Electronic Supplementary Information for Dalton Transactions  
This journal is © The Royal Society of Chemistry 2011

|                     |            |
|---------------------|------------|
| P(3)-Ir(2)-P(4)     | 164.12(5)  |
| C(32)-P(3)-C(24)    | 106.3(3)   |
| C(32)-P(3)-C(28)    | 102.3(3)   |
| C(24)-P(3)-C(28)    | 109.3(3)   |
| C(32)-P(3)-Ir(2)    | 93.41(19)  |
| C(24)-P(3)-Ir(2)    | 121.4(2)   |
| C(28)-P(3)-Ir(2)    | 119.57(19) |
| C(38)-P(4)-C(39)    | 105.5(3)   |
| C(38)-P(4)-C(43)    | 102.0(3)   |
| C(39)-P(4)-C(43)    | 107.9(3)   |
| C(38)-P(4)-Ir(2)    | 94.49(19)  |
| C(39)-P(4)-Ir(2)    | 122.53(19) |
| C(43)-P(4)-Ir(2)    | 119.81(19) |
| C(33)-N(2)-C(37)    | 120.8(5)   |
| C(33)-N(2)-Ir(2)    | 119.4(4)   |
| C(37)-N(2)-Ir(2)    | 119.7(4)   |
| C(25)-C(24)-C(26)   | 107.7(5)   |
| C(25)-C(24)-C(27)   | 105.3(5)   |
| C(26)-C(24)-C(27)   | 110.3(5)   |
| C(25)-C(24)-P(3)    | 111.8(4)   |
| C(26)-C(24)-P(3)    | 109.3(4)   |
| C(27)-C(24)-P(3)    | 112.2(4)   |
| C(24)-C(25)-H(25A)  | 109.5      |
| C(24)-C(25)-H(25B)  | 109.5      |
| H(25A)-C(25)-H(25B) | 109.5      |
| C(24)-C(25)-H(25C)  | 109.5      |
| H(25A)-C(25)-H(25C) | 109.5      |
| H(25B)-C(25)-H(25C) | 109.5      |
| C(24)-C(26)-H(26A)  | 109.5      |
| C(24)-C(26)-H(26B)  | 109.5      |
| H(26A)-C(26)-H(26B) | 109.5      |
| C(24)-C(26)-H(26C)  | 109.5      |
| H(26A)-C(26)-H(26C) | 109.5      |
| H(26B)-C(26)-H(26C) | 109.5      |
| C(24)-C(27)-H(27A)  | 109.5      |
| C(24)-C(27)-H(27B)  | 109.5      |

Electronic Supplementary Information for Dalton Transactions  
This journal is © The Royal Society of Chemistry 2011

|                     |          |
|---------------------|----------|
| H(27A)-C(27)-H(27B) | 109.5    |
| C(24)-C(27)-H(27C)  | 109.5    |
| H(27A)-C(27)-H(27C) | 109.5    |
| H(27B)-C(27)-H(27C) | 109.5    |
| C(29)-C(28)-C(31)   | 107.9(5) |
| C(29)-C(28)-C(30)   | 108.7(5) |
| C(31)-C(28)-C(30)   | 105.9(5) |
| C(29)-C(28)-P(3)    | 111.9(4) |
| C(31)-C(28)-P(3)    | 109.1(4) |
| C(30)-C(28)-P(3)    | 113.0(4) |
| C(28)-C(29)-H(29A)  | 109.5    |
| C(28)-C(29)-H(29B)  | 109.5    |
| H(29A)-C(29)-H(29B) | 109.5    |
| C(28)-C(29)-H(29C)  | 109.5    |
| H(29A)-C(29)-H(29C) | 109.5    |
| H(29B)-C(29)-H(29C) | 109.5    |
| C(28)-C(30)-H(30A)  | 109.5    |
| C(28)-C(30)-H(30B)  | 109.5    |
| H(30A)-C(30)-H(30B) | 109.5    |
| C(28)-C(30)-H(30C)  | 109.5    |
| H(30A)-C(30)-H(30C) | 109.5    |
| H(30B)-C(30)-H(30C) | 109.5    |
| C(28)-C(31)-H(31A)  | 109.5    |
| C(28)-C(31)-H(31B)  | 109.5    |
| H(31A)-C(31)-H(31B) | 109.5    |
| C(28)-C(31)-H(31C)  | 109.5    |
| H(31A)-C(31)-H(31C) | 109.5    |
| H(31B)-C(31)-H(31C) | 109.5    |
| C(33)-C(32)-P(3)    | 109.9(4) |
| C(33)-C(32)-H(32A)  | 109.7    |
| P(3)-C(32)-H(32A)   | 109.7    |
| C(33)-C(32)-H(32B)  | 109.7    |
| P(3)-C(32)-H(32B)   | 109.7    |
| H(32A)-C(32)-H(32B) | 108.2    |
| N(2)-C(33)-C(34)    | 120.1(5) |
| N(2)-C(33)-C(32)    | 118.4(5) |



Electronic Supplementary Information for Dalton Transactions  
This journal is © The Royal Society of Chemistry 2011

|                     |          |
|---------------------|----------|
| C(34)-C(33)-C(32)   | 121.4(5) |
| C(33)-C(34)-C(35)   | 120.0(6) |
| C(33)-C(34)-H(34)   | 120.0    |
| C(35)-C(34)-H(34)   | 120.0    |
| C(36)-C(35)-C(34)   | 118.9(6) |
| C(36)-C(35)-H(35)   | 120.6    |
| C(34)-C(35)-H(35)   | 120.6    |
| C(35)-C(36)-C(37)   | 119.8(6) |
| C(35)-C(36)-H(36)   | 120.1    |
| C(37)-C(36)-H(36)   | 120.1    |
| N(2)-C(37)-C(36)    | 120.3(6) |
| N(2)-C(37)-C(38)    | 118.8(5) |
| C(36)-C(37)-C(38)   | 120.9(5) |
| C(37)-C(38)-P(4)    | 110.5(4) |
| C(37)-C(38)-H(38A)  | 109.5    |
| P(4)-C(38)-H(38A)   | 109.5    |
| C(37)-C(38)-H(38B)  | 109.5    |
| P(4)-C(38)-H(38B)   | 109.5    |
| H(38A)-C(38)-H(38B) | 108.1    |
| C(42)-C(39)-C(41)   | 110.4(5) |
| C(42)-C(39)-C(40)   | 106.8(5) |
| C(41)-C(39)-C(40)   | 107.5(5) |
| C(42)-C(39)-P(4)    | 109.3(4) |
| C(41)-C(39)-P(4)    | 111.1(4) |
| C(40)-C(39)-P(4)    | 111.8(4) |
| C(39)-C(40)-H(40A)  | 109.5    |
| C(39)-C(40)-H(40B)  | 109.5    |
| H(40A)-C(40)-H(40B) | 109.5    |
| C(39)-C(40)-H(40C)  | 109.5    |
| H(40A)-C(40)-H(40C) | 109.5    |
| H(40B)-C(40)-H(40C) | 109.5    |
| C(39)-C(41)-H(41A)  | 109.5    |
| C(39)-C(41)-H(41B)  | 109.5    |
| H(41A)-C(41)-H(41B) | 109.5    |
| C(39)-C(41)-H(41C)  | 109.5    |
| H(41A)-C(41)-H(41C) | 109.5    |

Electronic Supplementary Information for Dalton Transactions  
This journal is © The Royal Society of Chemistry 2011

|                     |          |
|---------------------|----------|
| H(41B)-C(41)-H(41C) | 109.5    |
| C(39)-C(42)-H(42A)  | 109.5    |
| C(39)-C(42)-H(42B)  | 109.5    |
| H(42A)-C(42)-H(42B) | 109.5    |
| C(39)-C(42)-H(42C)  | 109.5    |
| H(42A)-C(42)-H(42C) | 109.5    |
| H(42B)-C(42)-H(42C) | 109.5    |
| C(44)-C(43)-C(45)   | 108.6(5) |
| C(44)-C(43)-C(46)   | 108.5(5) |
| C(45)-C(43)-C(46)   | 106.1(5) |
| C(44)-C(43)-P(4)    | 111.2(4) |
| C(45)-C(43)-P(4)    | 114.1(4) |
| C(46)-C(43)-P(4)    | 108.1(4) |
| C(43)-C(44)-H(44A)  | 109.5    |
| C(43)-C(44)-H(44B)  | 109.5    |
| H(44A)-C(44)-H(44B) | 109.5    |
| C(43)-C(44)-H(44C)  | 109.5    |
| H(44A)-C(44)-H(44C) | 109.5    |
| H(44B)-C(44)-H(44C) | 109.5    |
| C(43)-C(45)-H(45A)  | 109.5    |
| C(43)-C(45)-H(45B)  | 109.5    |
| H(45A)-C(45)-H(45B) | 109.5    |
| C(43)-C(45)-H(45C)  | 109.5    |
| H(45A)-C(45)-H(45C) | 109.5    |
| H(45B)-C(45)-H(45C) | 109.5    |
| C(43)-C(46)-H(46A)  | 109.5    |
| C(43)-C(46)-H(46B)  | 109.5    |
| H(46A)-C(46)-H(46B) | 109.5    |
| C(43)-C(46)-H(46C)  | 109.5    |
| H(46A)-C(46)-H(46C) | 109.5    |
| H(46B)-C(46)-H(46C) | 109.5    |
| Cl(7)-C(47)-Cl(8)   | 108.8(4) |
| Cl(7)-C(47)-H(47A)  | 109.9    |
| Cl(8)-C(47)-H(47A)  | 109.9    |
| Cl(7)-C(47)-H(47B)  | 109.9    |
| Cl(8)-C(47)-H(47B)  | 109.9    |

Electronic Supplementary Information for Dalton Transactions  
This journal is © The Royal Society of Chemistry 2011

H(47A)-C(47)-H(47B)            108.3

---

Symmetry transformations used to generate equivalent atoms:

Electronic Supplementary Information for Dalton Transactions  
 This journal is © The Royal Society of Chemistry 2011

Table 4. Anisotropic displacement parameters ( $\text{\AA}^2 \times 10^3$ ) for C46 H86 Cl6 Ir2 N2 P4 \* C1 H2 Cl2. The anisotropic

displacement factor exponent takes the form:  $-2\pi^2 [ h^2 a^{*2} U^{11} + \dots + 2 h k a^* b^* U^{12} ]$

|       | U <sup>11</sup> | U <sup>22</sup> | U <sup>33</sup> | U <sup>23</sup> | U <sup>13</sup> | U <sup>12</sup> |
|-------|-----------------|-----------------|-----------------|-----------------|-----------------|-----------------|
| Ir(1) | 12(1)           | 13(1)           | 16(1)           | 5(1)            | 6(1)            | 4(1)            |
| Cl(1) | 14(1)           | 24(1)           | 24(1)           | 10(1)           | 8(1)            | 8(1)            |
| Cl(2) | 20(1)           | 13(1)           | 24(1)           | 4(1)            | 5(1)            | 3(1)            |
| Cl(3) | 16(1)           | 25(1)           | 19(1)           | 8(1)            | 8(1)            | 11(1)           |
| P(1)  | 15(1)           | 14(1)           | 16(1)           | 6(1)            | 8(1)            | 5(1)            |
| P(2)  | 17(1)           | 17(1)           | 17(1)           | 7(1)            | 6(1)            | 6(1)            |
| N(1)  | 9(2)            | 18(2)           | 18(2)           | 5(2)            | 4(2)            | 4(2)            |
| C(1)  | 18(3)           | 17(3)           | 20(3)           | 5(2)            | 2(2)            | 7(2)            |
| C(2)  | 11(3)           | 27(3)           | 24(3)           | 6(2)            | 4(2)            | 4(2)            |
| C(3)  | 29(3)           | 18(3)           | 24(3)           | 9(2)            | 5(3)            | 9(3)            |
| C(4)  | 23(3)           | 30(3)           | 20(3)           | 9(2)            | 8(2)            | 15(3)           |
| C(5)  | 20(3)           | 21(3)           | 17(3)           | 5(2)            | 9(2)            | 5(2)            |
| C(6)  | 29(3)           | 17(3)           | 28(3)           | 7(2)            | 15(3)           | 7(3)            |
| C(7)  | 27(3)           | 20(3)           | 29(3)           | 11(3)           | 20(3)           | 9(3)            |
| C(8)  | 22(3)           | 46(4)           | 25(3)           | 16(3)           | 13(3)           | 9(3)            |
| C(9)  | 16(3)           | 11(3)           | 20(3)           | 6(2)            | 5(2)            | 3(2)            |
| C(10) | 17(3)           | 18(3)           | 21(3)           | 9(2)            | 6(2)            | 7(2)            |
| C(11) | 21(3)           | 24(3)           | 18(3)           | 5(2)            | 5(2)            | 8(3)            |
| C(12) | 15(3)           | 18(3)           | 23(3)           | 6(2)            | 0(2)            | 0(2)            |
| C(13) | 18(3)           | 18(3)           | 23(3)           | 10(2)           | 5(2)            | -2(2)           |
| C(14) | 11(3)           | 18(3)           | 21(3)           | 9(2)            | 5(2)            | 2(2)            |
| C(15) | 14(3)           | 16(3)           | 22(3)           | 9(2)            | 7(2)            | 2(2)            |
| C(16) | 28(3)           | 30(3)           | 13(3)           | 6(2)            | 10(2)           | 19(3)           |
| C(17) | 39(4)           | 35(4)           | 20(3)           | 9(3)            | 11(3)           | 27(3)           |
| C(18) | 28(4)           | 40(4)           | 25(3)           | 13(3)           | 15(3)           | 14(3)           |
| C(19) | 34(4)           | 23(3)           | 23(3)           | 2(3)            | 8(3)            | 11(3)           |
| C(20) | 17(3)           | 18(3)           | 23(3)           | 8(2)            | 3(2)            | 8(2)            |
| C(21) | 20(3)           | 29(3)           | 21(3)           | 4(2)            | 4(2)            | 16(3)           |
| C(22) | 29(3)           | 32(4)           | 16(3)           | 7(3)            | 7(2)            | 15(3)           |
| C(23) | 20(3)           | 19(3)           | 30(3)           | 10(2)           | 8(2)            | 7(2)            |

Electronic Supplementary Information for Dalton Transactions  
This journal is © The Royal Society of Chemistry 2011

|       |       |       |       |       |       |        |
|-------|-------|-------|-------|-------|-------|--------|
| Ir(2) | 14(1) | 13(1) | 15(1) | 6(1)  | 6(1)  | 5(1)   |
| Cl(4) | 21(1) | 21(1) | 18(1) | 9(1)  | 6(1)  | 7(1)   |
| Cl(5) | 23(1) | 14(1) | 25(1) | 9(1)  | 9(1)  | 5(1)   |
| Cl(6) | 18(1) | 26(1) | 17(1) | 10(1) | 6(1)  | 9(1)   |
| P(3)  | 14(1) | 18(1) | 18(1) | 7(1)  | 8(1)  | 7(1)   |
| P(4)  | 12(1) | 14(1) | 19(1) | 5(1)  | 4(1)  | 5(1)   |
| N(2)  | 16(2) | 16(2) | 22(2) | 10(2) | 9(2)  | 7(2)   |
| C(24) | 17(3) | 25(3) | 32(3) | 12(3) | 12(2) | 12(3)  |
| C(25) | 28(3) | 34(4) | 35(4) | 23(3) | 13(3) | 19(3)  |
| C(26) | 34(4) | 26(3) | 44(4) | 18(3) | 16(3) | 17(3)  |
| C(27) | 21(3) | 33(4) | 42(4) | 24(3) | 12(3) | 16(3)  |
| C(28) | 18(3) | 17(3) | 20(3) | 7(2)  | 8(2)  | 3(2)   |
| C(29) | 25(3) | 33(4) | 23(3) | 0(3)  | 10(3) | 8(3)   |
| C(30) | 21(3) | 25(3) | 23(3) | 8(3)  | 9(2)  | 3(3)   |
| C(31) | 23(3) | 25(3) | 25(3) | 14(3) | 9(3)  | 5(3)   |
| C(32) | 14(3) | 25(3) | 13(3) | 5(2)  | 3(2)  | 4(2)   |
| C(33) | 17(3) | 24(3) | 16(3) | 5(2)  | 5(2)  | 8(2)   |
| C(34) | 14(3) | 21(3) | 23(3) | 2(2)  | 4(2)  | 0(2)   |
| C(35) | 30(3) | 8(3)  | 33(3) | 6(2)  | 8(3)  | 3(2)   |
| C(36) | 24(3) | 24(3) | 32(3) | 9(3)  | 6(3)  | 10(3)  |
| C(37) | 20(3) | 21(3) | 16(3) | 6(2)  | 6(2)  | 9(2)   |
| C(38) | 13(3) | 12(3) | 30(3) | 11(2) | 5(2)  | 3(2)   |
| C(39) | 17(3) | 14(3) | 16(3) | 5(2)  | 5(2)  | 4(2)   |
| C(40) | 20(3) | 23(3) | 22(3) | 0(2)  | 4(2)  | 5(3)   |
| C(41) | 17(3) | 25(3) | 32(3) | 10(3) | 5(3)  | 6(3)   |
| C(42) | 19(3) | 21(3) | 25(3) | 7(2)  | 5(2)  | 1(2)   |
| C(43) | 15(3) | 19(3) | 17(3) | 0(2)  | 2(2)  | 5(2)   |
| C(44) | 22(3) | 24(3) | 25(3) | 8(3)  | 11(2) | 8(3)   |
| C(45) | 21(3) | 15(3) | 29(3) | 2(2)  | 9(2)  | 7(2)   |
| C(46) | 16(3) | 27(3) | 17(3) | -3(2) | 4(2)  | 5(3)   |
| C(47) | 41(5) | 33(4) | 59(6) | -2(4) | 19(4) | 0(4)   |
| Cl(7) | 89(2) | 60(2) | 79(2) | -4(1) | 49(2) | -10(2) |
| Cl(8) | 33(1) | 47(1) | 58(1) | 24(1) | 7(1)  | 5(1)   |

---

Electronic Supplementary Information for Dalton Transactions  
This journal is © The Royal Society of Chemistry 2011

Table 5. Hydrogen coordinates ( $\times 10^4$ ) and isotropic displacement parameters ( $\text{\AA}^2 \times 10^{-3}$ )  
for C46 H86 Cl6 Ir2 N2 P4 \* C1 H2 Cl2.

|        | x    | y    | z    | U(eq) |
|--------|------|------|------|-------|
| H(2A)  | 8759 | 5506 | 5723 | 34    |
| H(2B)  | 8875 | 4750 | 4905 | 34    |
| H(2C)  | 9613 | 4990 | 5788 | 34    |
| H(3A)  | 7445 | 3605 | 6586 | 35    |
| H(3B)  | 7656 | 4765 | 6628 | 35    |
| H(3C)  | 8703 | 4508 | 6816 | 35    |
| H(4A)  | 8978 | 3191 | 5689 | 34    |
| H(4B)  | 8319 | 2838 | 4753 | 34    |
| H(4C)  | 7670 | 2385 | 5381 | 34    |
| H(6A)  | 4917 | 1441 | 5487 | 38    |
| H(6B)  | 6248 | 2164 | 5763 | 38    |
| H(6C)  | 5642 | 1486 | 4808 | 38    |
| H(7A)  | 4572 | 3036 | 6194 | 37    |
| H(7B)  | 5102 | 4064 | 5957 | 37    |
| H(7C)  | 5902 | 3759 | 6480 | 37    |
| H(8A)  | 4287 | 1874 | 4071 | 47    |
| H(8B)  | 4068 | 2877 | 4498 | 47    |
| H(8C)  | 3637 | 1890 | 4795 | 47    |
| H(9A)  | 5839 | 4906 | 5034 | 20    |
| H(9B)  | 6958 | 5363 | 5747 | 20    |
| H(11)  | 7830 | 7031 | 5507 | 27    |
| H(12)  | 8895 | 7917 | 4733 | 26    |
| H(13)  | 8913 | 6941 | 3414 | 27    |
| H(15A) | 8480 | 4631 | 2600 | 22    |
| H(15B) | 7962 | 5278 | 2225 | 22    |
| H(17A) | 6756 | 1698 | 1846 | 42    |
| H(17B) | 7974 | 2546 | 1878 | 42    |
| H(17C) | 7255 | 1560 | 1045 | 42    |
| H(18A) | 7508 | 2804 | 295  | 45    |
| H(18B) | 8177 | 3802 | 1129 | 45    |

Electronic Supplementary Information for Dalton Transactions  
This journal is © The Royal Society of Chemistry 2011

|        |       |       |      |    |
|--------|-------|-------|------|----|
| H(18C) | 7095  | 3711  | 554  | 45 |
| H(19A) | 5156  | 2255  | 422  | 42 |
| H(19B) | 5026  | 1600  | 1026 | 42 |
| H(19C) | 5587  | 1357  | 268  | 42 |
| H(21A) | 6438  | 5758  | 2479 | 35 |
| H(21B) | 5611  | 5093  | 2927 | 35 |
| H(21C) | 5115  | 5424  | 2232 | 35 |
| H(22A) | 5286  | 4782  | 837  | 38 |
| H(22B) | 5613  | 3824  | 515  | 38 |
| H(22C) | 6559  | 4961  | 1106 | 38 |
| H(23A) | 3816  | 3696  | 1729 | 34 |
| H(23B) | 4230  | 2820  | 1769 | 34 |
| H(23C) | 4007  | 2999  | 916  | 34 |
| H(25A) | 10576 | 7598  | 2736 | 41 |
| H(25B) | 11685 | 8491  | 3421 | 41 |
| H(25C) | 11631 | 7362  | 2950 | 41 |
| H(26A) | 11818 | 6816  | 1668 | 47 |
| H(26B) | 12092 | 7535  | 1112 | 47 |
| H(26C) | 10833 | 6981  | 1204 | 47 |
| H(27A) | 13296 | 9442  | 3168 | 42 |
| H(27B) | 13505 | 9296  | 2261 | 42 |
| H(27C) | 13491 | 8450  | 2671 | 42 |
| H(29A) | 10051 | 8172  | 154  | 45 |
| H(29B) | 10958 | 7713  | 216  | 45 |
| H(29C) | 11044 | 8455  | -312 | 45 |
| H(30A) | 12972 | 8942  | 956  | 38 |
| H(30B) | 13316 | 10159 | 1445 | 38 |
| H(30C) | 12996 | 9705  | 457  | 38 |
| H(31A) | 11506 | 10269 | 317  | 37 |
| H(31B) | 11966 | 10875 | 1294 | 37 |
| H(31C) | 10650 | 10133 | 905  | 37 |
| H(32A) | 12095 | 10410 | 3257 | 23 |
| H(32B) | 12722 | 10788 | 2590 | 23 |
| H(34)  | 12650 | 12477 | 2916 | 28 |
| H(35)  | 11569 | 13389 | 2750 | 31 |
| H(36)  | 9608  | 12504 | 2471 | 32 |

Electronic Supplementary Information for Dalton Transactions  
This journal is © The Royal Society of Chemistry 2011

|        |      |       |       |    |
|--------|------|-------|-------|----|
| H(38A) | 7981 | 10227 | 1554  | 22 |
| H(38B) | 7955 | 10940 | 2435  | 22 |
| H(40A) | 6653 | 7211  | 1158  | 37 |
| H(40B) | 6663 | 8037  | 727   | 37 |
| H(40C) | 5492 | 7190  | 772   | 37 |
| H(41A) | 4939 | 8567  | 1440  | 38 |
| H(41B) | 6077 | 9410  | 1351  | 38 |
| H(41C) | 5779 | 9565  | 2232  | 38 |
| H(42A) | 5016 | 7227  | 2041  | 36 |
| H(42B) | 5678 | 8220  | 2879  | 36 |
| H(42C) | 6208 | 7419  | 2538  | 36 |
| H(44A) | 8069 | 9564  | 4658  | 36 |
| H(44B) | 8169 | 8759  | 3862  | 36 |
| H(44C) | 6959 | 8688  | 3966  | 36 |
| H(45A) | 6199 | 9700  | 3433  | 34 |
| H(45B) | 7049 | 10851 | 3493  | 34 |
| H(45C) | 6965 | 10568 | 4311  | 34 |
| H(46A) | 9022 | 11470 | 3807  | 36 |
| H(46B) | 9621 | 10750 | 3939  | 36 |
| H(46C) | 9057 | 11197 | 4632  | 36 |
| H(47A) | 8032 | 6582  | 9572  | 65 |
| H(47B) | 8598 | 6068  | 10072 | 65 |



Electronic Supplementary Information for Dalton Transactions  
This journal is © The Royal Society of Chemistry 2011

C. X-Ray Diffraction Data for Ir(PNP)\*(I)<sub>2</sub> (**3b**).

Table 1. Crystal data and structure refinement for C<sub>23</sub>H<sub>42</sub>I<sub>2</sub>IrN<sub>2</sub>P<sub>2</sub>.

|                                   |                                                                                |                 |
|-----------------------------------|--------------------------------------------------------------------------------|-----------------|
| Identification code               | periana24                                                                      |                 |
| Empirical formula                 | C <sub>23</sub> H <sub>42</sub> I <sub>2</sub> IrN <sub>2</sub> P <sub>2</sub> |                 |
| Formula weight                    | 840.52                                                                         |                 |
| Temperature                       | 296(2) K                                                                       |                 |
| Wavelength                        | 0.71073 Å                                                                      |                 |
| Crystal system                    | Monoclinic                                                                     |                 |
| Space group                       | P2(1)/c                                                                        |                 |
| Unit cell dimensions              | a = 14.348(4) Å                                                                | α = 90°.        |
|                                   | b = 11.993(3) Å                                                                | β = 90.767(3)°. |
|                                   | c = 16.442(4) Å                                                                | γ = 90°.        |
| Volume                            | 2828.9(12) Å <sup>3</sup>                                                      |                 |
| Z                                 | 4                                                                              |                 |
| Density (calculated)              | 1.974 Mg/m <sup>3</sup>                                                        |                 |
| Absorption coefficient            | 7.026 mm <sup>-1</sup>                                                         |                 |
| F(000)                            | 1600                                                                           |                 |
| Crystal size                      | 0.15 x 0.10 x 0.05 mm <sup>3</sup>                                             |                 |
| Theta range for data collection   | 1.42 to 28.33°.                                                                |                 |
| Index ranges                      | -19 ≤ h ≤ 19, -15 ≤ k ≤ 15, -21 ≤ l ≤ 21                                       |                 |
| Reflections collected             | 27266                                                                          |                 |
| Independent reflections           | 7019 [R(int) = 0.0363]                                                         |                 |
| Completeness to theta = 28.33°    | 99.7 %                                                                         |                 |
| Absorption correction             | Semi-empirical from equivalents                                                |                 |
| Max. and min. transmission        | 0.745 and 0.546                                                                |                 |
| Refinement method                 | Full-matrix least-squares on F <sup>2</sup>                                    |                 |
| Data / restraints / parameters    | 7019 / 0 / 273                                                                 |                 |
| Goodness-of-fit on F <sup>2</sup> | 1.049                                                                          |                 |
| Final R indices [I > 2σ(I)]       | R1 = 0.0350, wR2 = 0.0837                                                      |                 |
| R indices (all data)              | R1 = 0.0441, wR2 = 0.0883                                                      |                 |
| Largest diff. peak and hole       | 2.797 and -0.811 e.Å <sup>-3</sup>                                             |                 |

Electronic Supplementary Information for Dalton Transactions  
This journal is © The Royal Society of Chemistry 2011

Table 2. Atomic coordinates ( $\times 10^4$ ) and equivalent isotropic displacement parameters ( $\text{\AA}^2 \times 10^3$ ) for C<sub>23</sub>H<sub>42</sub>I<sub>2</sub>IrN<sub>2</sub>P<sub>2</sub>. U(eq) is defined as one third of the trace of the orthogonalized  $U^{ij}$  tensor.

|       | x       | y        | z       | U(eq) |
|-------|---------|----------|---------|-------|
| Ir(1) | 7475(1) | 8805(1)  | 1479(1) | 28(1) |
| I(1)  | 9058(1) | 8715(1)  | 2572(1) | 46(1) |
| I(2)  | 6356(1) | 8143(1)  | 2676(1) | 51(1) |
| P(1)  | 7560(1) | 7041(1)  | 822(1)  | 32(1) |
| P(2)  | 7337(1) | 10684(1) | 1695(1) | 35(1) |
| N(1)  | 8227(2) | 9334(3)  | 485(2)  | 33(1) |
| C(1)  | 8571(4) | 6097(4)  | 1047(3) | 44(1) |
| C(2)  | 6474(4) | 6158(4)  | 654(3)  | 43(1) |
| C(3)  | 7809(4) | 7572(4)  | -204(3) | 42(1) |
| C(4)  | 8586(4) | 5782(5)  | 1956(3) | 55(1) |
| C(5)  | 8613(5) | 5008(5)  | 546(4)  | 67(2) |
| C(6)  | 9468(3) | 6764(5)  | 845(4)  | 56(2) |
| C(7)  | 5638(4) | 6928(5)  | 548(4)  | 57(2) |
| C(8)  | 6294(4) | 5424(5)  | 1386(4) | 57(2) |
| C(9)  | 6530(4) | 5433(5)  | -112(4) | 59(2) |
| C(10) | 6323(3) | 10740(5) | 979(3)  | 45(1) |
| C(11) | 7281(4) | 11664(4) | 2589(3) | 49(1) |
| C(12) | 8391(4) | 11131(4) | 1153(3) | 45(1) |
| C(13) | 6349(3) | 9470(4)  | 782(3)  | 42(1) |
| C(14) | 5380(4) | 10985(6) | 1366(4) | 66(2) |
| C(15) | 6450(4) | 11469(6) | 232(4)  | 62(2) |
| C(16) | 6466(6) | 11352(6) | 3143(4) | 75(2) |
| C(17) | 7115(6) | 12836(5) | 2270(5) | 89(2) |
| C(18) | 8197(6) | 11625(8) | 3067(5) | 98(3) |
| C(19) | 8308(3) | 8663(4)  | -189(3) | 38(1) |
| C(20) | 8766(4) | 9032(5)  | -871(3) | 52(1) |
| C(21) | 9111(4) | 10107(5) | -904(3) | 54(1) |
| C(22) | 8988(4) | 10785(5) | -251(3) | 49(1) |
| C(23) | 8558(3) | 10392(4) | 443(3)  | 39(1) |

Electronic Supplementary Information for Dalton Transactions  
This journal is © The Royal Society of Chemistry 2011

Table 3. Bond lengths [Å] and angles [°] for C<sub>23</sub>H<sub>42</sub>I<sub>2</sub>IrN<sub>2</sub>P<sub>2</sub>.

---

|             |            |
|-------------|------------|
| Ir(1)-N(1)  | 2.072(4)   |
| Ir(1)-C(13) | 2.124(5)   |
| Ir(1)-P(2)  | 2.2901(14) |
| Ir(1)-P(1)  | 2.3794(13) |
| Ir(1)-I(2)  | 2.6757(6)  |
| Ir(1)-I(1)  | 2.8789(6)  |
| P(1)-C(3)   | 1.841(5)   |
| P(1)-C(1)   | 1.874(5)   |
| P(1)-C(2)   | 1.901(5)   |
| P(2)-C(12)  | 1.845(5)   |
| P(2)-C(10)  | 1.861(5)   |
| P(2)-C(11)  | 1.885(5)   |
| N(1)-C(23)  | 1.357(6)   |
| N(1)-C(19)  | 1.376(6)   |
| C(1)-C(4)   | 1.542(7)   |
| C(1)-C(5)   | 1.546(8)   |
| C(1)-C(6)   | 1.555(7)   |
| C(2)-C(8)   | 1.515(7)   |
| C(2)-C(7)   | 1.522(8)   |
| C(2)-C(9)   | 1.533(8)   |
| C(3)-C(19)  | 1.492(7)   |
| C(3)-H(3A)  | 0.9700     |
| C(3)-H(3B)  | 0.9700     |
| C(4)-H(4A)  | 0.9600     |
| C(4)-H(4B)  | 0.9600     |
| C(4)-H(4C)  | 0.9600     |
| C(5)-H(5A)  | 0.9600     |
| C(5)-H(5B)  | 0.9600     |
| C(5)-H(5C)  | 0.9600     |
| C(6)-H(6A)  | 0.9600     |
| C(6)-H(6B)  | 0.9600     |
| C(6)-H(6C)  | 0.9600     |
| C(7)-H(7A)  | 0.9600     |
| C(7)-H(7B)  | 0.9600     |

Electronic Supplementary Information for Dalton Transactions  
This journal is © The Royal Society of Chemistry 2011

|              |          |
|--------------|----------|
| C(7)-H(7C)   | 0.9600   |
| C(8)-H(8A)   | 0.9600   |
| C(8)-H(8B)   | 0.9600   |
| C(8)-H(8C)   | 0.9600   |
| C(9)-H(9A)   | 0.9600   |
| C(9)-H(9B)   | 0.9600   |
| C(9)-H(9C)   | 0.9600   |
| C(10)-C(15)  | 1.521(8) |
| C(10)-C(14)  | 1.531(7) |
| C(10)-C(13)  | 1.557(7) |
| C(11)-C(17)  | 1.519(8) |
| C(11)-C(18)  | 1.522(9) |
| C(11)-C(16)  | 1.537(8) |
| C(12)-C(23)  | 1.488(7) |
| C(12)-H(12A) | 0.9700   |
| C(12)-H(12B) | 0.9700   |
| C(13)-H(13A) | 0.9700   |
| C(13)-H(13B) | 0.9700   |
| C(14)-H(14A) | 0.9600   |
| C(14)-H(14B) | 0.9600   |
| C(14)-H(14C) | 0.9600   |
| C(15)-H(15A) | 0.9600   |
| C(15)-H(15B) | 0.9600   |
| C(15)-H(15C) | 0.9600   |
| C(16)-H(16A) | 0.9600   |
| C(16)-H(16B) | 0.9600   |
| C(16)-H(16C) | 0.9600   |
| C(17)-H(17A) | 0.9600   |
| C(17)-H(17B) | 0.9600   |
| C(17)-H(17C) | 0.9600   |
| C(18)-H(18A) | 0.9600   |
| C(18)-H(18B) | 0.9600   |
| C(18)-H(18C) | 0.9600   |
| C(19)-C(20)  | 1.379(7) |
| C(20)-C(21)  | 1.382(8) |
| C(20)-H(20)  | 0.9300   |

Electronic Supplementary Information for Dalton Transactions  
This journal is © The Royal Society of Chemistry 2011

|                  |            |
|------------------|------------|
| C(21)-C(22)      | 1.360(8)   |
| C(21)-H(21)      | 0.9300     |
| C(22)-C(23)      | 1.386(7)   |
| C(22)-H(22)      | 0.9300     |
|                  |            |
| N(1)-Ir(1)-C(13) | 81.89(17)  |
| N(1)-Ir(1)-P(2)  | 82.39(11)  |
| C(13)-Ir(1)-P(2) | 69.38(14)  |
| N(1)-Ir(1)-P(1)  | 83.28(11)  |
| C(13)-Ir(1)-P(1) | 97.57(14)  |
| P(2)-Ir(1)-P(1)  | 161.83(4)  |
| N(1)-Ir(1)-I(2)  | 174.52(10) |
| C(13)-Ir(1)-I(2) | 92.82(14)  |
| P(2)-Ir(1)-I(2)  | 97.13(3)   |
| P(1)-Ir(1)-I(2)  | 96.07(3)   |
| N(1)-Ir(1)-I(1)  | 95.09(10)  |
| C(13)-Ir(1)-I(1) | 159.88(14) |
| P(2)-Ir(1)-I(1)  | 90.52(3)   |
| P(1)-Ir(1)-I(1)  | 101.83(3)  |
| I(2)-Ir(1)-I(1)  | 90.37(2)   |
| C(3)-P(1)-C(1)   | 103.4(2)   |
| C(3)-P(1)-C(2)   | 103.2(2)   |
| C(1)-P(1)-C(2)   | 108.8(2)   |
| C(3)-P(1)-Ir(1)  | 96.95(17)  |
| C(1)-P(1)-Ir(1)  | 119.47(17) |
| C(2)-P(1)-Ir(1)  | 120.93(17) |
| C(12)-P(2)-C(10) | 108.8(3)   |
| C(12)-P(2)-C(11) | 103.9(2)   |
| C(10)-P(2)-C(11) | 115.4(2)   |
| C(12)-P(2)-Ir(1) | 97.95(17)  |
| C(10)-P(2)-Ir(1) | 90.31(18)  |
| C(11)-P(2)-Ir(1) | 137.67(18) |
| C(23)-N(1)-C(19) | 118.2(4)   |
| C(23)-N(1)-Ir(1) | 120.9(3)   |
| C(19)-N(1)-Ir(1) | 120.5(3)   |
| C(4)-C(1)-C(5)   | 108.1(5)   |

Electronic Supplementary Information for Dalton Transactions  
This journal is © The Royal Society of Chemistry 2011

|                  |          |
|------------------|----------|
| C(4)-C(1)-C(6)   | 109.4(5) |
| C(5)-C(1)-C(6)   | 106.4(5) |
| C(4)-C(1)-P(1)   | 109.9(4) |
| C(5)-C(1)-P(1)   | 116.2(4) |
| C(6)-C(1)-P(1)   | 106.7(4) |
| C(8)-C(2)-C(7)   | 107.5(5) |
| C(8)-C(2)-C(9)   | 109.5(5) |
| C(7)-C(2)-C(9)   | 107.4(5) |
| C(8)-C(2)-P(1)   | 110.9(4) |
| C(7)-C(2)-P(1)   | 108.8(3) |
| C(9)-C(2)-P(1)   | 112.6(4) |
| C(19)-C(3)-P(1)  | 112.8(3) |
| C(19)-C(3)-H(3A) | 109.0    |
| P(1)-C(3)-H(3A)  | 109.0    |
| C(19)-C(3)-H(3B) | 109.0    |
| P(1)-C(3)-H(3B)  | 109.0    |
| H(3A)-C(3)-H(3B) | 107.8    |
| C(1)-C(4)-H(4A)  | 109.5    |
| C(1)-C(4)-H(4B)  | 109.5    |
| H(4A)-C(4)-H(4B) | 109.5    |
| C(1)-C(4)-H(4C)  | 109.5    |
| H(4A)-C(4)-H(4C) | 109.5    |
| H(4B)-C(4)-H(4C) | 109.5    |
| C(1)-C(5)-H(5A)  | 109.5    |
| C(1)-C(5)-H(5B)  | 109.5    |
| H(5A)-C(5)-H(5B) | 109.5    |
| C(1)-C(5)-H(5C)  | 109.5    |
| H(5A)-C(5)-H(5C) | 109.5    |
| H(5B)-C(5)-H(5C) | 109.5    |
| C(1)-C(6)-H(6A)  | 109.5    |
| C(1)-C(6)-H(6B)  | 109.5    |
| H(6A)-C(6)-H(6B) | 109.5    |
| C(1)-C(6)-H(6C)  | 109.5    |
| H(6A)-C(6)-H(6C) | 109.5    |
| H(6B)-C(6)-H(6C) | 109.5    |
| C(2)-C(7)-H(7A)  | 109.5    |

Electronic Supplementary Information for Dalton Transactions  
This journal is © The Royal Society of Chemistry 2011

|                     |          |
|---------------------|----------|
| C(2)-C(7)-H(7B)     | 109.5    |
| H(7A)-C(7)-H(7B)    | 109.5    |
| C(2)-C(7)-H(7C)     | 109.5    |
| H(7A)-C(7)-H(7C)    | 109.5    |
| H(7B)-C(7)-H(7C)    | 109.5    |
| C(2)-C(8)-H(8A)     | 109.5    |
| C(2)-C(8)-H(8B)     | 109.5    |
| H(8A)-C(8)-H(8B)    | 109.5    |
| C(2)-C(8)-H(8C)     | 109.5    |
| H(8A)-C(8)-H(8C)    | 109.5    |
| H(8B)-C(8)-H(8C)    | 109.5    |
| C(2)-C(9)-H(9A)     | 109.5    |
| C(2)-C(9)-H(9B)     | 109.5    |
| H(9A)-C(9)-H(9B)    | 109.5    |
| C(2)-C(9)-H(9C)     | 109.5    |
| H(9A)-C(9)-H(9C)    | 109.5    |
| H(9B)-C(9)-H(9C)    | 109.5    |
| C(15)-C(10)-C(14)   | 110.0(5) |
| C(15)-C(10)-C(13)   | 113.0(5) |
| C(14)-C(10)-C(13)   | 107.4(5) |
| C(15)-C(10)-P(2)    | 115.5(4) |
| C(14)-C(10)-P(2)    | 115.6(4) |
| C(13)-C(10)-P(2)    | 94.4(3)  |
| C(17)-C(11)-C(18)   | 109.7(6) |
| C(17)-C(11)-C(16)   | 108.3(5) |
| C(18)-C(11)-C(16)   | 110.2(6) |
| C(17)-C(11)-P(2)    | 108.4(4) |
| C(18)-C(11)-P(2)    | 109.7(4) |
| C(16)-C(11)-P(2)    | 110.5(4) |
| C(23)-C(12)-P(2)    | 110.4(3) |
| C(23)-C(12)-H(12A)  | 109.6    |
| P(2)-C(12)-H(12A)   | 109.6    |
| C(23)-C(12)-H(12B)  | 109.6    |
| P(2)-C(12)-H(12B)   | 109.6    |
| H(12A)-C(12)-H(12B) | 108.1    |
| C(10)-C(13)-Ir(1)   | 105.9(3) |

Electronic Supplementary Information for Dalton Transactions  
This journal is © The Royal Society of Chemistry 2011

|                     |          |
|---------------------|----------|
| C(10)-C(13)-H(13A)  | 110.5    |
| Ir(1)-C(13)-H(13A)  | 110.5    |
| C(10)-C(13)-H(13B)  | 110.5    |
| Ir(1)-C(13)-H(13B)  | 110.5    |
| H(13A)-C(13)-H(13B) | 108.7    |
| C(10)-C(14)-H(14A)  | 109.5    |
| C(10)-C(14)-H(14B)  | 109.5    |
| H(14A)-C(14)-H(14B) | 109.5    |
| C(10)-C(14)-H(14C)  | 109.5    |
| H(14A)-C(14)-H(14C) | 109.5    |
| H(14B)-C(14)-H(14C) | 109.5    |
| C(10)-C(15)-H(15A)  | 109.5    |
| C(10)-C(15)-H(15B)  | 109.5    |
| H(15A)-C(15)-H(15B) | 109.5    |
| C(10)-C(15)-H(15C)  | 109.5    |
| H(15A)-C(15)-H(15C) | 109.5    |
| H(15B)-C(15)-H(15C) | 109.5    |
| C(11)-C(16)-H(16A)  | 109.5    |
| C(11)-C(16)-H(16B)  | 109.5    |
| H(16A)-C(16)-H(16B) | 109.5    |
| C(11)-C(16)-H(16C)  | 109.5    |
| H(16A)-C(16)-H(16C) | 109.5    |
| H(16B)-C(16)-H(16C) | 109.5    |
| C(11)-C(17)-H(17A)  | 109.5    |
| C(11)-C(17)-H(17B)  | 109.5    |
| H(17A)-C(17)-H(17B) | 109.5    |
| C(11)-C(17)-H(17C)  | 109.5    |
| H(17A)-C(17)-H(17C) | 109.5    |
| H(17B)-C(17)-H(17C) | 109.5    |
| C(11)-C(18)-H(18A)  | 109.5    |
| C(11)-C(18)-H(18B)  | 109.5    |
| H(18A)-C(18)-H(18B) | 109.5    |
| C(11)-C(18)-H(18C)  | 109.5    |
| H(18A)-C(18)-H(18C) | 109.5    |
| H(18B)-C(18)-H(18C) | 109.5    |
| N(1)-C(19)-C(20)    | 120.9(5) |



Electronic Supplementary Information for Dalton Transactions  
This journal is © The Royal Society of Chemistry 2011

|                   |          |
|-------------------|----------|
| N(1)-C(19)-C(3)   | 118.7(4) |
| C(20)-C(19)-C(3)  | 120.1(5) |
| C(19)-C(20)-C(21) | 120.4(5) |
| C(19)-C(20)-H(20) | 119.8    |
| C(21)-C(20)-H(20) | 119.8    |
| C(22)-C(21)-C(20) | 118.4(5) |
| C(22)-C(21)-H(21) | 120.8    |
| C(20)-C(21)-H(21) | 120.8    |
| C(21)-C(22)-C(23) | 120.6(5) |
| C(21)-C(22)-H(22) | 119.7    |
| C(23)-C(22)-H(22) | 119.7    |
| N(1)-C(23)-C(22)  | 121.3(5) |
| N(1)-C(23)-C(12)  | 117.2(4) |
| C(22)-C(23)-C(12) | 121.4(5) |

---

Symmetry transformations used to generate equivalent atoms:

Electronic Supplementary Information for Dalton Transactions  
 This journal is © The Royal Society of Chemistry 2011

Table 4. Anisotropic displacement parameters ( $\text{\AA}^2 \times 10^3$ ) for C23 H42 I2 Ir N P2. The anisotropic displacement factor exponent takes the form:  $-2\pi^2 [ h^2 a^{*2} U^{11} + \dots + 2 h k a^* b^* U^{12} ]$

|       | U <sup>11</sup> | U <sup>22</sup> | U <sup>33</sup> | U <sup>23</sup> | U <sup>13</sup> | U <sup>12</sup> |
|-------|-----------------|-----------------|-----------------|-----------------|-----------------|-----------------|
| Ir(1) | 27(1)           | 32(1)           | 25(1)           | 3(1)            | 0(1)            | -2(1)           |
| I(1)  | 44(1)           | 49(1)           | 45(1)           | 6(1)            | -11(1)          | -7(1)           |
| I(2)  | 54(1)           | 58(1)           | 41(1)           | 2(1)            | 16(1)           | -16(1)          |
| P(1)  | 35(1)           | 34(1)           | 28(1)           | 1(1)            | -2(1)           | -2(1)           |
| P(2)  | 39(1)           | 33(1)           | 34(1)           | 2(1)            | 1(1)            | 1(1)            |
| N(1)  | 30(2)           | 39(2)           | 29(2)           | 6(2)            | 1(1)            | -2(2)           |
| C(1)  | 47(3)           | 40(3)           | 44(3)           | 3(2)            | -1(2)           | 7(2)            |
| C(2)  | 43(3)           | 40(3)           | 44(3)           | 0(2)            | -8(2)           | -11(2)          |
| C(3)  | 52(3)           | 44(3)           | 29(2)           | 1(2)            | -1(2)           | -6(2)           |
| C(4)  | 60(3)           | 52(3)           | 54(3)           | 11(3)           | -12(3)          | 3(3)            |
| C(5)  | 69(4)           | 49(4)           | 82(5)           | -18(3)          | -1(3)           | 15(3)           |
| C(6)  | 35(3)           | 64(4)           | 67(4)           | -8(3)           | 5(2)            | 8(3)            |
| C(7)  | 45(3)           | 54(3)           | 73(4)           | 1(3)            | -15(3)          | -15(3)          |
| C(8)  | 59(3)           | 54(3)           | 59(4)           | 6(3)            | 1(3)            | -14(3)          |
| C(9)  | 69(4)           | 56(4)           | 53(3)           | -10(3)          | -12(3)          | -14(3)          |
| C(10) | 42(3)           | 47(3)           | 46(3)           | 2(2)            | 0(2)            | 6(2)            |
| C(11) | 66(4)           | 37(3)           | 45(3)           | -7(2)           | 9(3)            | 0(3)            |
| C(12) | 47(3)           | 38(3)           | 50(3)           | 6(2)            | 6(2)            | -6(2)           |
| C(13) | 36(2)           | 47(3)           | 41(3)           | 0(2)            | -7(2)           | 3(2)            |
| C(14) | 41(3)           | 77(4)           | 80(5)           | -7(4)           | 1(3)            | 15(3)           |
| C(15) | 61(4)           | 64(4)           | 62(4)           | 26(3)           | -12(3)          | 7(3)            |
| C(16) | 111(6)          | 66(4)           | 48(4)           | -6(3)           | 29(4)           | -5(4)           |
| C(17) | 138(7)          | 43(4)           | 86(5)           | -10(4)          | 18(5)           | 7(4)            |
| C(18) | 96(6)           | 114(6)          | 84(5)           | -58(5)          | -33(5)          | 29(5)           |
| C(19) | 35(2)           | 48(3)           | 31(2)           | 6(2)            | 1(2)            | -1(2)           |
| C(20) | 59(3)           | 68(4)           | 29(3)           | 4(2)            | 12(2)           | -2(3)           |
| C(21) | 56(3)           | 65(4)           | 41(3)           | 13(3)           | 15(2)           | -7(3)           |
| C(22) | 47(3)           | 49(3)           | 51(3)           | 16(3)           | 9(2)            | -5(2)           |
| C(23) | 35(2)           | 40(3)           | 41(3)           | 8(2)            | 2(2)            | 0(2)            |

Electronic Supplementary Information for Dalton Transactions  
This journal is © The Royal Society of Chemistry 2011

Table 5. Hydrogen coordinates ( $\times 10^4$ ) and isotropic displacement parameters ( $\text{\AA}^2 \times 10^{-3}$ )  
for C23 H42 I2 Ir N P2.

|        | x     | y     | z    | U(eq) |
|--------|-------|-------|------|-------|
| H(3A)  | 8185  | 7029  | -489 | 50    |
| H(3B)  | 7227  | 7657  | -504 | 50    |
| H(4A)  | 8049  | 5337  | 2076 | 83    |
| H(4B)  | 8577  | 6449  | 2280 | 83    |
| H(4C)  | 9142  | 5366  | 2080 | 83    |
| H(5A)  | 9190  | 4630  | 661  | 100   |
| H(5B)  | 8576  | 5182  | -23  | 100   |
| H(5C)  | 8101  | 4535  | 688  | 100   |
| H(6A)  | 10005 | 6368  | 1049 | 83    |
| H(6B)  | 9441  | 7486  | 1095 | 83    |
| H(6C)  | 9514  | 6848  | 266  | 83    |
| H(7A)  | 5093  | 6493  | 422  | 86    |
| H(7B)  | 5752  | 7441  | 112  | 86    |
| H(7C)  | 5543  | 7336  | 1042 | 86    |
| H(8A)  | 6294  | 5873  | 1869 | 86    |
| H(8B)  | 6775  | 4870  | 1430 | 86    |
| H(8C)  | 5700  | 5065  | 1321 | 86    |
| H(9A)  | 5920  | 5161  | -253 | 89    |
| H(9B)  | 6939  | 4813  | -9   | 89    |
| H(9C)  | 6766  | 5869  | -553 | 89    |
| H(12A) | 8314  | 11894 | 968  | 54    |
| H(12B) | 8925  | 11105 | 1520 | 54    |
| H(13A) | 6449  | 9352  | 206  | 50    |
| H(13B) | 5767  | 9117  | 930  | 50    |
| H(14A) | 5355  | 11755 | 1523 | 99    |
| H(14B) | 5306  | 10523 | 1838 | 99    |
| H(14C) | 4889  | 10830 | 981  | 99    |
| H(15A) | 5913  | 11401 | -119 | 94    |
| H(15B) | 6995  | 11234 | -53  | 94    |
| H(15C) | 6522  | 12232 | 397  | 94    |

Electronic Supplementary Information for Dalton Transactions  
This journal is © The Royal Society of Chemistry 2011

|        |      |       |       |     |
|--------|------|-------|-------|-----|
| H(16A) | 6530 | 10590 | 3312  | 113 |
| H(16B) | 5888 | 11443 | 2849  | 113 |
| H(16C) | 6471 | 11828 | 3612  | 113 |
| H(17A) | 6550 | 12851 | 1950  | 133 |
| H(17B) | 7629 | 13057 | 1938  | 133 |
| H(17C) | 7060 | 13343 | 2719  | 133 |
| H(18A) | 8172 | 12141 | 3513  | 147 |
| H(18B) | 8699 | 11825 | 2716  | 147 |
| H(18C) | 8296 | 10885 | 3273  | 147 |
| H(20)  | 8844 | 8554  | -1310 | 62  |
| H(21)  | 9419 | 10361 | -1362 | 65  |
| H(22)  | 9195 | 11519 | -270  | 59  |

1. (a) G.M. Sheldrick, *SHELXTL*, version 6.14; Bruker Analytical X-ray System, Inc.: Madison, WI, 1997 (b) R. H. Blessing, *Acta Crystallogr. A* 51, 1995, **33**. (c) *Internal Tables for Crystallographers, Vol. A, Space-Group Symmetry*. D. Reidel Publishing Company, 1983, ISBN 90-277-1445-2.

Electronic Supplementary Information for Dalton Transactions  
This journal is © The Royal Society of Chemistry 2011

#### D. Computational Details

All energies discussed in this work are Gibbs free energies. For organometallic species these are calculated as:

$$G_{298K} = E_{\text{elec}} + G_{\text{solv}} + \text{ZPVE} + \sum_{\nu} \frac{h\nu}{e^{h\nu/kT} - 1} + \frac{n}{2}kT - T(S_{\text{vib}} + S_{\text{rot}} + S_{\text{trans}}),$$

where  $n = 12$  accounts for the potential and kinetic energies of the translational and rotational modes and  $T = 298\text{K}$ . The values of  $(S_{\text{rot}} + S_{\text{trans}})$  for each Ir intermediate were assumed to cancel. The free energies of gases were calculated with ideal gas statistical mechanics.

The geometry optimizations and zero-point vibrational energy (ZPVE) were carried out using the B3LYP functional<sup>2</sup> and the following basis: for Ir<sup>3</sup> and I<sup>4</sup>, the Los Alamos angular momentum projected effective core potential (ECP) using the double- $\zeta$  contraction of valence functions; for Cl, 6-31G\*\*++<sup>5</sup>; for P, 6-31G\*\* with two  $d$ -functions ( $\alpha_1 = .45$ ,  $\alpha_2 = 1.35$ ) to allow core polarization; for others, 6-31G\*\*. In order to obtain more accurate electronic energies, single-point energy calculations using the M06 functional<sup>6</sup> and a larger basis set were performed for  $E_{\text{elec}}$ , in which Ir was described with a triple- $\zeta$  contraction of the valence functions augmented with two  $f$  functions<sup>7</sup> and the core electrons were described by the same ECP, phosphorus was described by the 6-311+G-(3df) basis<sup>8</sup>, iodine by the Los Alamos ECP with 3- $\zeta$   $s$  and  $p$  functions, 3- $\zeta$   $d$  functions ( $\alpha_1 = 1.143$ ,  $\alpha_2 = 0.35$ ,  $\alpha_3 = 0.10$ ) and a single  $f$  function ( $\alpha = 0.35$ ), and the other atoms were described with the 6-311++G\*\* basis set.<sup>9</sup>

Solvation energies were calculated using the Poisson-Boltzmann self-consistent polarizable continuum method<sup>10</sup> implemented in Jaguar<sup>11</sup> to represent dimethylacetamide (dielectric constant = 38.85 and effective radius = 2.64 Å). The solvation calculations used the B3LYP/LACVP\*\* level of theory and the gas-phase optimized structures.

Electronic Supplementary Information for Dalton Transactions  
This journal is © The Royal Society of Chemistry 2011

<sup>2</sup> (a) Becke, A. D. *Phys. Rev. A* **1988**, *38*, 309. (b) Becke, A. D. *J. Chem. Phys.* **1993**, *98*, 5648.

(c) Lee, C. T.; Yang, W. T.; Parr, R. G. *Phys. Rev. B* **1988**, *37*, 785.

<sup>3</sup> Hay, P. J.; Wadt, W. R. *J. Chem. Phys.* **1985**, *82*, 299.

<sup>4</sup> Wadt, W. R.; Hay, P. J., *Journal of Chemical Physics* **1985**, *82* (1), 284-298.

<sup>5</sup> (a) Hehre, W. J.; Ditchfie.R; Pople, J. A. *J. Chem. Phys.* **1972**, *56*, 2257. (b) Francl, M. M.; Pietro, W. J.; Hehre, W. J.; Binkley, J. S.; Gordon, M. S.; Defrees, D. J.; Pople, J. A. *J. Chem. Phys.* **1982**, *77*, 3654.

<sup>6</sup> Zhao, Y.; Truhlar, D. G. *Theoretical Chemistry Accounts* **2008**, *120* (1-3), 215-241.

<sup>7</sup> Martin, J. M. L.; Sundermann, A. *J. Chem. Phys.* **2001**, *114*, 3408.

<sup>8</sup> (a) McLean, A. D.; Chandler, G. S. *J. Chem. Phys.* **1980**, *72*, 5639. (b) Clark, T.; Chandrasekhar, J.; Spitznagel, G. W.; Schleyer, P. V. *J. Comput. Chem.* **1983**, *4*, 294. (c) Frisch, M. J.; Pople, J. A.; Binkley, J. S. *J. Chem. Phys.* **1984**, *80*, 3265.

<sup>9</sup> (a) Krishnan, R.; Binkley, J. S.; Seeger, R.; Pople, J. A. *J. Chem. Phys.* **1980**, *72*, 650. (b) Clark, T.; Chandrasekhar, J.; Spitznagel, G. W.; Schleyer, P. V. *J. Comput. Chem.* **1983**, *4*, 294.

<sup>10</sup> (a) Tannor, D. J.; Marten, B.; Murphy, R.; Friesner, R. A.; Sitkoff, D.; Nicholls, A.; Ringnalda, M.; Goddard, W. A.; Honig, B. *J. Am. Chem. Soc.* **1994**, *116*, 11875. (b) Marten, B.; Kim, K.; Cortis, C.; Friesner, R. A.; Murphy, R. B.; Ringnalda, M. N.; Sitkoff, D.; Honig, B. *J. Phys. Chem.* **1996**, *100*, 11775.

<sup>11</sup> *Jaguar 7.0*; Schrodinger, I. P., OR, 2007.

Electronic Supplementary Information for Dalton Transactions  
This journal is © The Royal Society of Chemistry 2010

### Cartesian Coordinates from DFT

#### 3a [(PNP)IrI<sub>3</sub>]

E(SCF) = -1778.28547693501

|     |               |               |               |
|-----|---------------|---------------|---------------|
| Ir1 | -0.0088106397 | 0.0208091077  | -0.0720193054 |
| N2  | -0.0479258004 | -0.0085456469 | 2.0268472872  |
| C3  | 1.0498181376  | 0.3820716124  | 2.7302127275  |
| C4  | 1.0320498047  | 0.3825100714  | 4.1247870197  |
| C5  | -0.1043142181 | -0.0437999348 | 4.8028731970  |
| C6  | -1.2119205798 | -0.4533644249 | 4.0689509642  |
| C7  | -1.1726096141 | -0.4180023570 | 2.6751947471  |
| H8  | 1.9152751967  | 0.7078030594  | 4.6637270959  |
| H9  | -0.1263055645 | -0.0572227008 | 5.8884690615  |
| H10 | -2.1157367981 | -0.7928207027 | 4.5632904088  |
| P11 | 2.4517491276  | -0.1043283633 | 0.3530814232  |
| P12 | -2.4750761450 | 0.1190258205  | 0.2518724287  |
| C13 | -3.7621008590 | -0.8345279799 | -0.8653634194 |
| C14 | -3.3844420162 | 1.7424044782  | 0.8640578185  |
| C15 | 3.3319048582  | -1.7441802024 | 0.9730495188  |
| C16 | 3.7865798088  | 0.8657618980  | -0.6892974554 |
| I17 | -0.2017184595 | -2.7704035135 | -0.1354219102 |
| I21 | 0.2019351657  | 2.8236666378  | -0.0400411681 |
| C22 | 2.2830136155  | 0.8135345844  | 1.9739652942  |
| C23 | -2.3720685451 | -0.8340214790 | 1.8580720890  |
| H17 | 3.1642593183  | 0.7228098519  | 2.6137785112  |
| H18 | 2.1655673670  | 1.8688933903  | 1.7005089697  |
| H19 | -3.2800008858 | -0.7589600889 | 2.4616724987  |
| H20 | -2.2406786352 | -1.8830335414 | 1.5667299790  |
| C24 | 3.4198288576  | -2.8156494701 | -0.1400760390 |
| H25 | 4.1830382682  | -2.5820012917 | -0.8819411785 |
| H26 | 3.6986249626  | -3.7713328032 | 0.3209330596  |
| H27 | 2.4725097570  | -2.9655024818 | -0.6542450957 |
| C28 | 4.7640012627  | -1.4999891722 | 1.5059246415  |
| H29 | 5.4794847819  | -1.2269609174 | 0.7306227237  |
| H30 | 4.8047811352  | -0.7487340108 | 2.3006987979  |
| H31 | 5.1141951113  | -2.4425349673 | 1.9446614947  |
| C32 | 2.5465753896  | -2.3114617128 | 2.1806905419  |
| H33 | 2.9645351584  | -3.2962975223 | 2.4217662136  |
| H34 | 2.6677621879  | -1.6891910555 | 3.0715443838  |
| H35 | 1.4862200464  | -2.4522869243 | 1.9804393679  |
| C36 | 4.8424739712  | 1.5316007524  | 0.2228127949  |
| H37 | 4.3924614348  | 2.2922689051  | 0.8676364489  |
| H38 | 5.4021358062  | 0.8375079049  | 0.8472623033  |
| H39 | 5.5657398431  | 2.0483335396  | -0.4198269654 |
| C40 | 4.4591427745  | -0.1114894999 | -1.6813547480 |
| H41 | 5.0999664268  | -0.8508357095 | -1.2025862551 |

Electronic Supplementary Information for Dalton Transactions  
This journal is © The Royal Society of Chemistry 2010

|     |               |               |               |
|-----|---------------|---------------|---------------|
| H42 | 3.7207501745  | -0.6296968023 | -2.3005495712 |
| H43 | 5.0944303286  | 0.4740388651  | -2.3555208946 |
| C44 | 3.1809555841  | 1.9916951553  | -1.5512056718 |
| H45 | 3.9768184262  | 2.3579483881  | -2.2124268448 |
| H46 | 2.3541604833  | 1.6490261706  | -2.1742523532 |
| H47 | 2.8341088191  | 2.8308346292  | -0.9527725079 |
| C48 | -3.1236148038 | -1.9455668398 | -1.7232373347 |
| H49 | -2.8062705972 | -2.7983313328 | -1.1277081678 |
| H50 | -3.8922408855 | -2.2947616219 | -2.4247099419 |
| H51 | -2.2701294798 | -1.5940336279 | -2.3039082796 |
| C52 | -4.8541452330 | -1.5169710955 | -0.0094717330 |
| H53 | -4.4303629902 | -2.2884152845 | 0.6403591351  |
| H54 | -5.4409688009 | -0.8346554511 | 0.6028035889  |
| H55 | -5.5486850424 | -2.0233550870 | -0.6908138029 |
| C56 | -4.3935173899 | 0.1609101900  | -1.8662812727 |
| H57 | -5.0032579908 | -0.4117338403 | -2.5742660630 |
| H58 | -5.0507506733 | 0.8943771372  | -1.4011677158 |
| H59 | -3.6297820842 | 0.6864744981  | -2.4473791087 |
| C60 | -3.4175187047 | 2.8359114047  | -0.2301054989 |
| H61 | -4.1410167539 | 2.6165640498  | -1.0148727102 |
| H62 | -3.7211318346 | 3.7818840012  | 0.2351604554  |
| H63 | -2.4451210617 | 2.9963531192  | -0.6917315714 |
| C64 | -2.6560339827 | 2.2825673151  | 2.1190342925  |
| H65 | -1.5868925458 | 2.4232344709  | 1.9728426009  |
| H66 | -3.0817081572 | 3.2642072034  | 2.3594756947  |
| H67 | -2.8219616677 | 1.6428924459  | 2.9903160180  |
| C68 | -4.8399281939 | 1.4907006625  | 1.3252094911  |
| H69 | -5.2088810960 | 2.4252866371  | 1.7654886390  |
| H70 | -5.5195135683 | 1.2336587449  | 0.5130528604  |
| H71 | -4.9175550727 | 0.7244977524  | 2.1028542693  |
| I72 | 0.0369813114  | 0.0617146792  | -2.8121703918 |

**3b [(PNP)\*Ir(I)<sub>2</sub>]**

E(SCF) = -1766.29949789737

|     |               |               |               |
|-----|---------------|---------------|---------------|
| Ir1 | 0.0056784540  | -0.1796075489 | -0.0517207534 |
| N2  | 0.1070849210  | 0.3352432137  | 1.9879660551  |
| C3  | 1.1832505165  | -0.0405258000 | 2.7304102657  |
| C4  | 1.2546619205  | 0.2503382448  | 4.0925954409  |
| C5  | 0.2197935984  | 0.9469850103  | 4.7047453847  |
| C6  | -0.8413181425 | 1.3876913000  | 3.9212733771  |
| C7  | -0.8661761971 | 1.0979577214  | 2.5577803721  |
| H8  | 2.1194936882  | -0.0802222058 | 4.6575265678  |
| H9  | 0.2506398728  | 1.1638668353  | 5.7681824221  |
| H10 | -1.6453242039 | 1.9765787252  | 4.3495488740  |
| P11 | 2.2856436567  | -0.5103786068 | 0.2064993159  |
| P12 | -2.2342544585 | 0.7063669759  | 0.1294810747  |



Electronic Supplementary Information for Dalton Transactions  
This journal is © The Royal Society of Chemistry 2010

|     |               |               |               |
|-----|---------------|---------------|---------------|
| C13 | -3.6985280922 | -0.4277315218 | 0.6504484037  |
| C14 | -2.8849965134 | 2.0349184608  | -1.1034888785 |
| C15 | 3.6310639322  | -1.7020675177 | -0.4162105194 |
| C16 | 2.5784755421  | 1.3181342598  | -0.1791118465 |
| I17 | -0.4569935853 | -2.9855357833 | 0.6242547283  |
| C22 | 2.2954056771  | -0.7846885992 | 2.0462303059  |
| C23 | -1.9151547470 | 1.7087446740  | 1.6660078360  |
| H17 | 2.0797686614  | -1.8573544804 | 2.1379940157  |
| H18 | 3.2508760166  | -0.5819919966 | 2.5391922704  |
| H19 | -1.5164895199 | 2.6682015039  | 1.3118161151  |
| H20 | -2.8194328100 | 1.9363353201  | 2.2367158773  |
| C24 | 3.5857657306  | -1.8067706417 | -1.9546494208 |
| H25 | 3.8207483983  | -0.8640831219 | -2.4507352357 |
| H26 | 4.3341000464  | -2.5428593021 | -2.2727991643 |
| H27 | 2.6060472846  | -2.1381487356 | -2.3057397340 |
| C28 | 5.0158364143  | -1.1968920349 | 0.0463777394  |
| H29 | 5.2721850767  | -0.2207268935 | -0.3719691285 |
| H30 | 5.0929797458  | -1.1338291673 | 1.1370938377  |
| H31 | 5.7794102162  | -1.9092400959 | -0.2894947543 |
| C32 | 3.3982455882  | -3.1145250598 | 0.1647238666  |
| H33 | 4.1284427009  | -3.7939933432 | -0.2916660304 |
| H34 | 3.5549448939  | -3.1554693792 | 1.2469087068  |
| H35 | 2.3954041533  | -3.4891982263 | -0.0508879379 |
| C36 | 3.2866342483  | 2.1064538062  | 0.9344100812  |
| H37 | 2.7928804081  | 1.9989291816  | 1.9048817612  |
| H38 | 4.3335050035  | 1.8018081721  | 1.0491324107  |
| H39 | 3.2795455905  | 3.1746677533  | 0.6828826009  |
| C40 | 3.2897597465  | 1.5758366620  | -1.5202243641 |
| H41 | 4.3454359798  | 1.2879455977  | -1.5093071627 |
| H42 | 2.7883137254  | 1.0660857261  | -2.3468567002 |
| H43 | 3.2466367639  | 2.6525719564  | -1.7264763323 |
| C44 | 1.0549933157  | 1.6711114474  | -0.3342858391 |
| H45 | 0.8731826594  | 2.0855114348  | -1.3239238907 |
| H47 | 0.7566828424  | 2.4100784720  | 0.4192509298  |
| C48 | -3.3466912947 | -1.0529449781 | 2.0197877513  |
| H49 | -3.3694527278 | -0.3116560276 | 2.8262425397  |
| H50 | -4.1048622978 | -1.8088519763 | 2.2577022866  |
| H51 | -2.3793164924 | -1.5569481657 | 2.0173452292  |
| C52 | -5.0471496594 | 0.3000312223  | 0.8310400743  |
| H53 | -4.9929869900 | 1.1227659941  | 1.5520957433  |
| H54 | -5.4598568218 | 0.6814352310  | -0.1045209600 |
| H55 | -5.7696413088 | -0.4233976344 | 1.2287747361  |
| C56 | -3.8673127923 | -1.5461602020 | -0.4009604299 |
| H57 | -4.6415100009 | -2.2421860447 | -0.0543477293 |
| H58 | -4.1851365539 | -1.1573397874 | -1.3709933233 |
| H59 | -2.9457511624 | -2.1135604214 | -0.5403395111 |
| C60 | -3.6171255199 | 1.3542667634  | -2.2810783959 |

Electronic Supplementary Information for Dalton Transactions  
This journal is © The Royal Society of Chemistry 2010

|     |               |               |               |
|-----|---------------|---------------|---------------|
| H61 | -4.5670721435 | 0.9034930116  | -1.9862808669 |
| H62 | -3.8410077424 | 2.1152037923  | -3.0390828686 |
| H63 | -2.9939346517 | 0.5896201153  | -2.7528519508 |
| C64 | -1.6839187342 | 2.8034825404  | -1.6878712657 |
| H65 | -1.0270099080 | 2.1448390397  | -2.2570272506 |
| H66 | -2.0668547932 | 3.5754974851  | -2.3667372654 |
| H67 | -1.0956636750 | 3.3120720899  | -0.9183325557 |
| C68 | -3.8135585964 | 3.0793667580  | -0.4418091632 |
| H69 | -4.1174847271 | 3.8002943929  | -1.2104791544 |
| H70 | -4.7227231823 | 2.6557530311  | -0.0186356019 |
| H71 | -3.3046744547 | 3.6500392971  | 0.3416329716  |
| I72 | -0.1405778100 | -0.6998862418 | -2.7399521478 |

c [(PNP)\*Ir(I)(H<sub>2</sub>)<sup>+</sup>]

E(SCF) = -1755.87216159333

|     |               |               |               |
|-----|---------------|---------------|---------------|
| Ir1 | 0.0258931824  | -0.1574766425 | 0.0063347584  |
| N2  | 0.0869250921  | 0.2988535391  | 2.0627325395  |
| C3  | 1.1542052398  | -0.0918908155 | 2.8103966182  |
| C4  | 1.1952617014  | 0.1606974589  | 4.1804668612  |
| C5  | 0.1395896866  | 0.8316020998  | 4.7876800903  |
| C6  | -0.9112649038 | 1.2878886556  | 3.9983442207  |
| C7  | -0.9081820267 | 1.0374275729  | 2.6277159107  |
| H8  | 2.0506697184  | -0.1743041311 | 4.7565426587  |
| H9  | 0.1481656553  | 1.0198224720  | 5.8567117751  |
| H10 | -1.7252044346 | 1.8590338466  | 4.4307488278  |
| P11 | 2.3220178290  | -0.4860549684 | 0.3016753749  |
| P12 | -2.2568945809 | 0.6974589938  | 0.1775010258  |
| C13 | -3.7184925197 | -0.4511872107 | 0.6609423044  |
| C14 | -2.8447502865 | 2.0118633567  | -1.0926888861 |
| C15 | 3.5952500894  | -1.6960562166 | -0.4076154982 |
| C16 | 2.6159670007  | 1.3477242730  | -0.0365636311 |
| I17 | -0.4756316188 | -2.9375137106 | 0.4612157150  |
| C22 | 2.2904024358  | -0.8071505150 | 2.1273700381  |
| C23 | -1.9395716766 | 1.6710416808  | 1.7285955367  |
| H17 | 2.1075332641  | -1.8863801232 | 2.2032123674  |
| H18 | 3.2367643658  | -0.5912177221 | 2.6319101005  |
| H19 | -1.5357782353 | 2.6380136266  | 1.4010968527  |
| H20 | -2.8531975411 | 1.8884089434  | 2.2872517871  |
| C24 | 3.3805939431  | -1.8239060937 | -1.9305077328 |
| H25 | 3.5140253130  | -0.8788140654 | -2.4609761764 |
| H26 | 4.1178286886  | -2.5290670371 | -2.3302185085 |
| H27 | 2.3870478471  | -2.2212832260 | -2.1596279110 |
| C28 | 5.0173905509  | -1.1814679683 | -0.0892525339 |
| H29 | 5.2517129479  | -0.2353776005 | -0.5798999237 |
| H30 | 5.1827399274  | -1.0630755346 | 0.9867393034  |
| H31 | 5.7420998336  | -1.9224881544 | -0.4446475608 |

Electronic Supplementary Information for Dalton Transactions  
This journal is © The Royal Society of Chemistry 2010

|     |               |               |               |
|-----|---------------|---------------|---------------|
| C32 | 3.4245431075  | -3.0918853208 | 0.2319894651  |
| H33 | 4.1099101163  | -3.7792393328 | -0.2763499541 |
| H34 | 3.6945188342  | -3.1000536561 | 1.2920437110  |
| H35 | 2.4105152690  | -3.4815382868 | 0.1231452797  |
| C36 | 3.3896221186  | 2.0975344167  | 1.0590781817  |
| H37 | 2.9463760756  | 1.9636753401  | 2.0505695144  |
| H38 | 4.4373329736  | 1.7822003444  | 1.1062833923  |
| H39 | 3.3785547458  | 3.1720274273  | 0.8407391506  |
| C40 | 3.2572924162  | 1.6289298243  | -1.4092541495 |
| H41 | 4.3065306782  | 1.3312243593  | -1.4653248390 |
| H42 | 2.7141716681  | 1.1459183761  | -2.2270786617 |
| H43 | 3.2154958328  | 2.7094996557  | -1.5876393709 |
| C44 | 1.0979282380  | 1.7316843455  | -0.1114768813 |
| H45 | 0.8955963594  | 2.2814027193  | -1.0269757964 |
| H47 | 0.8072639877  | 2.3549278962  | 0.7380305050  |
| C48 | -3.3721838803 | -1.1055994594 | 2.0189508548  |
| H49 | -3.3967578528 | -0.3832897124 | 2.8411027174  |
| H50 | -4.1349199622 | -1.8613226735 | 2.2369685393  |
| H51 | -2.4077645029 | -1.6141615388 | 2.0145089601  |
| C52 | -5.0546590689 | 0.2988458289  | 0.8503613573  |
| H53 | -4.9884522173 | 1.1200527342  | 1.5712452887  |
| H54 | -5.4673324486 | 0.6831320024  | -0.0839763396 |
| H55 | -5.7835654681 | -0.4152158579 | 1.2507683822  |
| C56 | -3.9099313986 | -1.5462793438 | -0.4115390125 |
| H57 | -4.6887239710 | -2.2366204910 | -0.0674738901 |
| H58 | -4.2401915914 | -1.1390859765 | -1.3691248849 |
| H59 | -3.0024508813 | -2.1297956928 | -0.5707830768 |
| C60 | -3.5363026064 | 1.3096321851  | -2.2816637821 |
| H61 | -4.5039779869 | 0.8815333013  | -2.0161083769 |
| H62 | -3.7139797065 | 2.0483431711  | -3.0711170646 |
| H63 | -2.9156337000 | 0.5166018285  | -2.7124500898 |
| C64 | -1.6270533138 | 2.7744978164  | -1.6491224052 |
| H65 | -0.9456359371 | 2.1180574519  | -2.1942959083 |
| H66 | -1.9882754041 | 3.5345226789  | -2.3509519824 |
| H67 | -1.0634619018 | 3.2967906863  | -0.8715917017 |
| C68 | -3.7935152087 | 3.0629066248  | -0.4715368327 |
| H69 | -4.0767667278 | 3.7745632049  | -1.2552742389 |
| H70 | -4.7130206395 | 2.6405916172  | -0.0715618863 |
| H71 | -3.3078741807 | 3.6419133894  | 0.3200383385  |
| H73 | 0.0437786458  | -0.0008633426 | -1.6503413293 |
| H74 | -0.0996037101 | -0.9141252991 | -1.4737881524 |

**d** [(PNP)\*Ir(I)(H<sub>2</sub>)<sup>+</sup> hydrogenolysis TS]  
E(SCF) = -1755.86116689784

|     |              |               |               |
|-----|--------------|---------------|---------------|
| Ir1 | 0.0239856669 | -0.1455041930 | -0.0399871281 |
|-----|--------------|---------------|---------------|

Electronic Supplementary Information for Dalton Transactions  
This journal is © The Royal Society of Chemistry 2010

|     |               |               |               |
|-----|---------------|---------------|---------------|
| N2  | 0.0824717158  | 0.3300675845  | 2.1259638591  |
| C3  | 1.1645744262  | -0.0296983158 | 2.8553089646  |
| C4  | 1.2170682469  | 0.2301924833  | 4.2252368751  |
| C5  | 0.1408016021  | 0.8661717159  | 4.8379182403  |
| C6  | -0.9391815571 | 1.2802606705  | 4.0621644862  |
| C7  | -0.9341446349 | 1.0251906105  | 2.6907362565  |
| H8  | 2.0865335203  | -0.0727273671 | 4.7986618415  |
| H9  | 0.1540996561  | 1.0587961581  | 5.9063491276  |
| H10 | -1.7686952583 | 1.8195235259  | 4.5064680678  |
| P11 | 2.3134096448  | -0.4977746386 | 0.3070025231  |
| P12 | -2.2620764661 | 0.6722970543  | 0.1939391514  |
| C13 | -3.7173568638 | -0.4984276819 | 0.6430436549  |
| C14 | -2.8577730363 | 2.0163332398  | -1.0418524305 |
| C15 | 3.6031461379  | -1.7263336286 | -0.3438616210 |
| C16 | 2.6749108207  | 1.3139939268  | -0.0831206489 |
| I17 | -0.4430685014 | -2.8360355150 | 0.4252446677  |
| C22 | 2.3022410815  | -0.7365934411 | 2.1541356741  |
| C23 | -1.9813895637 | 1.6228735502  | 1.7785084243  |
| H17 | 2.1540175625  | -1.8160066344 | 2.2797310978  |
| H18 | 3.2580790159  | -0.4833988751 | 2.6232981816  |
| H19 | -1.6157259351 | 2.6128295819  | 1.4743709040  |
| H20 | -2.9120287947 | 1.7983246857  | 2.3241842528  |
| C24 | 3.3876015984  | -1.9231741419 | -1.8594867484 |
| H25 | 3.5343940263  | -1.0063661513 | -2.4335362464 |
| H26 | 4.1160783442  | -2.6561431865 | -2.2233455468 |
| H27 | 2.3869760569  | -2.3108164052 | -2.0704514563 |
| C28 | 5.0243745919  | -1.1969111089 | -0.0463349155 |
| H29 | 5.2599605485  | -0.2715004157 | -0.5748846577 |
| H30 | 5.1908603097  | -1.0358837547 | 1.0241028892  |
| H31 | 5.7496688643  | -1.9507826663 | -0.3725005435 |
| C32 | 3.4415835023  | -3.0950254319 | 0.3561438312  |
| H33 | 4.1348193495  | -3.7970523887 | -0.1202561735 |
| H34 | 3.7083191588  | -3.0566837475 | 1.4163667829  |
| H35 | 2.4322654710  | -3.4979995206 | 0.2587520063  |
| C36 | 3.5465774969  | 2.0684678171  | 0.9342149644  |
| H37 | 3.1688231379  | 1.9746644068  | 1.9568451371  |
| H38 | 4.5816278203  | 1.7124831284  | 0.9161722992  |
| H39 | 3.5632405076  | 3.1367308927  | 0.6872519074  |
| C40 | 3.2300778970  | 1.5162430243  | -1.5076230562 |
| H41 | 4.2535155199  | 1.1550163264  | -1.6199712336 |
| H42 | 2.6069914787  | 1.0326506904  | -2.2656410920 |
| H43 | 3.2405109889  | 2.5906949242  | -1.7250253096 |
| C44 | 1.2005895222  | 1.8185423425  | -0.0700194358 |
| H45 | 1.0469877401  | 2.5839200839  | -0.8340311730 |
| H47 | 0.8888407284  | 2.2373176660  | 0.8848828513  |
| C48 | -3.3817914604 | -1.1689917707 | 1.9966492570  |
| H49 | -3.4298989078 | -0.4591903648 | 2.8286432152  |

Electronic Supplementary Information for Dalton Transactions  
This journal is © The Royal Society of Chemistry 2010

|     |                |               |               |
|-----|----------------|---------------|---------------|
| H50 | -4.1371131637  | -1.9385342221 | 2.1914001091  |
| H51 | -2.4101274943  | -1.6623521100 | 2.0039370480  |
| C52 | -5.0652746449  | 0.2310808953  | 0.8314397808  |
| H53 | -5.0197047863  | 1.0364146010  | 1.5714101831  |
| H54 | -5.47111179854 | 0.6297906323  | -0.0997401515 |
| H55 | -5.7890678060  | -0.5016239861 | 1.2064410613  |
| C56 | -3.8893234151  | -1.5737186593 | -0.4524949716 |
| H57 | -4.6561433115  | -2.2846257414 | -0.1240532234 |
| H58 | -4.2265454832  | -1.1490919458 | -1.3999983899 |
| H59 | -2.9724483059  | -2.1356746888 | -0.6297457309 |
| C60 | -3.5168306316  | 1.3345880265  | -2.2608059400 |
| H61 | -4.4813008623  | 0.8837654380  | -2.0216166039 |
| H62 | -3.6956874894  | 2.0901798676  | -3.0341414010 |
| H63 | -2.8732459510  | 0.5639365387  | -2.6974629920 |
| C64 | -1.6481200310  | 2.8197389164  | -1.5601116204 |
| H65 | -0.9715561161  | 2.2018241366  | -2.1555166328 |
| H66 | -2.0182027682  | 3.6182344522  | -2.2126590981 |
| H67 | -1.0836919405  | 3.3023241278  | -0.7563572392 |
| C68 | -3.8321186384  | 3.0347138065  | -0.4054496932 |
| H69 | -4.1260921236  | 3.7567179087  | -1.1755841742 |
| H70 | -4.7445356803  | 2.5855171764  | -0.0198430627 |
| H71 | -3.3638057887  | 3.6067401624  | 0.4016105828  |
| H73 | 0.3007646266   | 0.9763543899  | -1.1333291548 |
| H74 | -0.0656027009  | -0.6891200100 | -1.5261989793 |

e [(PNP)Ir(I)<sub>2</sub>(H)]

E(SCF) = -1767.51831988294

|     |               |               |               |
|-----|---------------|---------------|---------------|
| Ir1 | -0.0187389020 | -0.1488820764 | -0.0404626379 |
| N2  | -0.1565951865 | 0.0001609163  | 2.0448415122  |
| C3  | 0.9376812019  | 0.3260617102  | 2.7837840993  |
| C4  | 0.8959312004  | 0.2885153341  | 4.1759256764  |
| C5  | -0.2902880636 | -0.0451884634 | 4.8219013805  |
| C6  | -1.4207825130 | -0.3028319046 | 4.0551574754  |
| C7  | -1.3382651624 | -0.2689524613 | 2.6635005833  |
| H8  | 1.7893112392  | 0.5355733155  | 4.7392561809  |
| H9  | -0.3369478781 | -0.0842710291 | 5.9059741641  |
| H10 | -2.3718167165 | -0.5372799401 | 4.5210791445  |
| P11 | 2.3299182243  | 0.0564402220  | 0.3521135749  |
| P12 | -2.3537502852 | 0.2200414024  | 0.1106022612  |
| C13 | -3.7339808073 | -0.6197913695 | -0.9314862015 |
| C14 | -2.7780999979 | 2.0885206517  | 0.3243357737  |
| C15 | 3.4919718396  | -1.4445087263 | 0.6401672067  |
| C16 | 3.2730313611  | 1.4319467399  | -0.6126833783 |
| I17 | -0.3039557484 | -3.0426454904 | 0.3654882954  |
| H21 | 0.0924262135  | 1.4033480528  | -0.2245227290 |

Electronic Supplementary Information for Dalton Transactions  
This journal is © The Royal Society of Chemistry 2010

|     |               |               |               |
|-----|---------------|---------------|---------------|
| C22 | 2.1572562349  | 0.8163251690  | 2.0498782360  |
| C23 | -2.5556111904 | -0.5187777856 | 1.8104427205  |
| H17 | 3.0520977558  | 0.7110534467  | 2.6685572272  |
| H18 | 2.0165322317  | 1.8904414228  | 1.8724636736  |
| H19 | -3.4597603282 | -0.2043389859 | 2.3405406296  |
| H20 | -2.6207100199 | -1.5996382811 | 1.6259118315  |
| C24 | 3.3939411680  | -2.3787540168 | -0.5855128199 |
| H25 | 3.7756976877  | -1.9084606289 | -1.4953105791 |
| H26 | 3.9988937646  | -3.2745740534 | -0.3964340050 |
| H27 | 2.3659331809  | -2.6980197526 | -0.7662969917 |
| C28 | 4.9722156452  | -1.0887863854 | 0.8905613002  |
| H29 | 5.4662250618  | -0.6541234805 | 0.0199674422  |
| H30 | 5.1070291134  | -0.4158356095 | 1.7439747622  |
| H31 | 5.5043291208  | -2.0173616958 | 1.1312544451  |
| C32 | 2.9965801217  | -2.1889682822 | 1.9015168555  |
| H33 | 3.5532020174  | -3.1303087233 | 1.9850715767  |
| H34 | 3.1924506102  | -1.6184381423 | 2.8160786524  |
| H35 | 1.9369003838  | -2.4440132425 | 1.8520415384  |
| C36 | 4.3991184019  | 2.0881289666  | 0.2204232859  |
| H37 | 4.0171939265  | 2.5862989483  | 1.1172714350  |
| H38 | 5.1808299370  | 1.3940691429  | 0.5236874184  |
| H39 | 4.8731053054  | 2.8629570092  | -0.3943022774 |
| C40 | 3.8590940575  | 0.8490179819  | -1.9175642485 |
| H41 | 4.6657389458  | 0.1353342074  | -1.7363386998 |
| H42 | 3.0878144777  | 0.3631148395  | -2.5211253886 |
| H43 | 4.2801109577  | 1.6700917463  | -2.5111509717 |
| C44 | 2.2870328195  | 2.5552173315  | -1.0027424290 |
| H45 | 2.8554064905  | 3.3495412823  | -1.5025576221 |
| H46 | 1.5184665955  | 2.1995609595  | -1.6900715868 |
| H47 | 1.7961315124  | 3.0053859486  | -0.1329177061 |
| C48 | -3.2604102084 | -2.0158138581 | -1.3840939485 |
| H49 | -3.0775608019 | -2.6906910135 | -0.5471046523 |
| H50 | -4.0528650684 | -2.4525399373 | -2.0053481280 |
| H51 | -2.3449586163 | -1.9682668985 | -1.9758244174 |
| C52 | -5.0355062381 | -0.8128697466 | -0.1197167385 |
| H53 | -4.8877265541 | -1.4775507705 | 0.7369748798  |
| H54 | -5.4773084356 | 0.1175742699  | 0.2385755093  |
| H55 | -5.7741314653 | -1.2952191689 | -0.7712331102 |
| C56 | -4.0209629494 | 0.2035287918  | -2.2064343382 |
| H57 | -4.7014890444 | -0.3758621281 | -2.8416906301 |
| H58 | -4.5093792615 | 1.1585522399  | -2.0019590650 |
| H59 | -3.1084688128 | 0.3842968721  | -2.7812185984 |
| C60 | -2.3637255842 | 2.8645201893  | -0.9464745417 |
| H61 | -2.9598592346 | 2.5987222461  | -1.8199126479 |
| H62 | -2.5030322008 | 3.9375351667  | -0.7655474792 |
| H63 | -1.3138721866 | 2.6946597271  | -1.1957563569 |
| C64 | -1.9630869486 | 2.6621182314  | 1.5065884072  |

Electronic Supplementary Information for Dalton Transactions  
This journal is © The Royal Society of Chemistry 2010

|     |               |               |               |
|-----|---------------|---------------|---------------|
| H65 | -0.8895076010 | 2.5224020774  | 1.3699904615  |
| H66 | -2.1565944164 | 3.7400344974  | 1.5661712704  |
| H67 | -2.2545308661 | 2.2286571036  | 2.4679161387  |
| C68 | -4.2644065804 | 2.3642808533  | 0.6348160189  |
| H69 | -4.3855756836 | 3.4355424732  | 0.8375321972  |
| H70 | -4.9273431913 | 2.1193489137  | -0.1961470039 |
| H71 | -4.6118516404 | 1.8291438061  | 1.5248977482  |
| I72 | 0.1133778625  | -0.3125445322 | -2.7734053471 |

(P<sup>t</sup>BuNP<sup>t</sup>Bu)IrI<sub>3</sub>

E(SCF) = -1778.28547693501

|     |               |               |               |
|-----|---------------|---------------|---------------|
| Ir1 | -0.0088106397 | 0.0208091077  | -0.0720193054 |
| N2  | -0.0479258004 | -0.0085456469 | 2.0268472872  |
| C3  | 1.0498181376  | 0.3820716124  | 2.7302127275  |
| C4  | 1.0320498047  | 0.3825100714  | 4.1247870197  |
| C5  | -0.1043142181 | -0.0437999348 | 4.8028731970  |
| C6  | -1.2119205798 | -0.4533644249 | 4.0689509642  |
| C7  | -1.1726096141 | -0.4180023570 | 2.6751947471  |
| H8  | 1.9152751967  | 0.7078030594  | 4.6637270959  |
| H9  | -0.1263055645 | -0.0572227008 | 5.8884690615  |
| H10 | -2.1157367981 | -0.7928207027 | 4.5632904088  |
| P11 | 2.4517491276  | -0.1043283633 | 0.3530814232  |
| P12 | -2.4750761450 | 0.1190258205  | 0.2518724287  |
| C13 | -3.7621008590 | -0.8345279799 | -0.8653634194 |
| C14 | -3.3844420162 | 1.7424044782  | 0.8640578185  |
| C15 | 3.3319048582  | -1.7441802024 | 0.9730495188  |
| C16 | 3.7865798088  | 0.8657618980  | -0.6892974554 |
| I17 | -0.2017184595 | -2.7704035135 | -0.1354219102 |
| I21 | 0.2019351657  | 2.8236666378  | -0.0400411681 |
| C22 | 2.2830136155  | 0.8135345844  | 1.9739652942  |
| C23 | -2.3720685451 | -0.8340214790 | 1.8580720890  |
| H17 | 3.1642593183  | 0.7228098519  | 2.6137785112  |
| H18 | 2.1655673670  | 1.8688933903  | 1.7005089697  |
| H19 | -3.2800008858 | -0.7589600889 | 2.4616724987  |
| H20 | -2.2406786352 | -1.8830335414 | 1.5667299790  |
| C24 | 3.4198288576  | -2.8156494701 | -0.1400760390 |
| H25 | 4.1830382682  | -2.5820012917 | -0.8819411785 |
| H26 | 3.6986249626  | -3.7713328032 | 0.3209330596  |
| H27 | 2.4725097570  | -2.9655024818 | -0.6542450957 |
| C28 | 4.7640012627  | -1.4999891722 | 1.5059246415  |
| H29 | 5.4794847819  | -1.2269609174 | 0.7306227237  |
| H30 | 4.8047811352  | -0.7487340108 | 2.3006987979  |
| H31 | 5.1141951113  | -2.4425349673 | 1.9446614947  |
| C32 | 2.5465753896  | -2.3114617128 | 2.1806905419  |
| H33 | 2.9645351584  | -3.2962975223 | 2.4217662136  |
| H34 | 2.6677621879  | -1.6891910555 | 3.0715443838  |

Electronic Supplementary Information for Dalton Transactions  
This journal is © The Royal Society of Chemistry 2010

|     |               |               |               |
|-----|---------------|---------------|---------------|
| H35 | 1.4862200464  | -2.4522869243 | 1.9804393679  |
| C36 | 4.8424739712  | 1.5316007524  | 0.2228127949  |
| H37 | 4.3924614348  | 2.2922689051  | 0.8676364489  |
| H38 | 5.4021358062  | 0.8375079049  | 0.8472623033  |
| H39 | 5.5657398431  | 2.0483335396  | -0.4198269654 |
| C40 | 4.4591427745  | -0.1114894999 | -1.6813547480 |
| H41 | 5.0999664268  | -0.8508357095 | -1.2025862551 |
| H42 | 3.7207501745  | -0.6296968023 | -2.3005495712 |
| H43 | 5.0944303286  | 0.4740388651  | -2.3555208946 |
| C44 | 3.1809555841  | 1.9916951553  | -1.5512056718 |
| H45 | 3.9768184262  | 2.3579483881  | -2.2124268448 |
| H46 | 2.3541604833  | 1.6490261706  | -2.1742523532 |
| H47 | 2.8341088191  | 2.8308346292  | -0.9527725079 |
| C48 | -3.1236148038 | -1.9455668398 | -1.7232373347 |
| H49 | -2.8062705972 | -2.7983313328 | -1.1277081678 |
| H50 | -3.8922408855 | -2.2947616219 | -2.4247099419 |
| H51 | -2.2701294798 | -1.5940336279 | -2.3039082796 |
| C52 | -4.8541452330 | -1.5169710955 | -0.0094717330 |
| H53 | -4.4303629902 | -2.2884152845 | 0.6403591351  |
| H54 | -5.4409688009 | -0.8346554511 | 0.6028035889  |
| H55 | -5.5486850424 | -2.0233550870 | -0.6908138029 |
| C56 | -4.3935173899 | 0.1609101900  | -1.8662812727 |
| H57 | -5.0032579908 | -0.4117338403 | -2.5742660630 |
| H58 | -5.0507506733 | 0.8943771372  | -1.4011677158 |
| H59 | -3.6297820842 | 0.6864744981  | -2.4473791087 |
| C60 | -3.4175187047 | 2.8359114047  | -0.2301054989 |
| H61 | -4.1410167539 | 2.6165640498  | -1.0148727102 |
| H62 | -3.7211318346 | 3.7818840012  | 0.2351604554  |
| H63 | -2.4451210617 | 2.9963531192  | -0.6917315714 |
| C64 | -2.6560339827 | 2.2825673151  | 2.1190342925  |
| H65 | -1.5868925458 | 2.4232344709  | 1.9728426009  |
| H66 | -3.0817081572 | 3.2642072034  | 2.3594756947  |
| H67 | -2.8219616677 | 1.6428924459  | 2.9903160180  |
| C68 | -4.8399281939 | 1.4907006625  | 1.3252094911  |
| H69 | -5.2088810960 | 2.4252866371  | 1.7654886390  |
| H70 | -5.5195135683 | 1.2336587449  | 0.5130528604  |
| H71 | -4.9175550727 | 0.7244977524  | 2.1028542693  |
| I72 | 0.0369813114  | 0.0617146792  | -2.8121703918 |

(P<sup>t</sup>BuNP<sup>t</sup>Bu)IrI

E(SCF) = -1755.50928915354

|     |               |               |              |
|-----|---------------|---------------|--------------|
| Ir1 | -0.0069798363 | 0.0093392322  | 0.0484628198 |
| N2  | -0.0480950815 | -0.0110880624 | 2.1053148711 |
| C3  | 1.0869472642  | 0.2192697037  | 2.8450837598 |
| C4  | 1.0762132838  | 0.2024459499  | 4.2366719243 |
| C5  | -0.1063631198 | -0.0327389827 | 4.9298938914 |



Electronic Supplementary Information for Dalton Transactions  
This journal is © The Royal Society of Chemistry 2010

|     |               |               |               |
|-----|---------------|---------------|---------------|
| C6  | -1.2593170813 | -0.2576033846 | 4.1851738117  |
| C7  | -1.2125747968 | -0.2534779158 | 2.7941820284  |
| H8  | 2.0045310706  | 0.3911878078  | 4.7662328949  |
| H9  | -0.1287503803 | -0.0407672815 | 6.0149258105  |
| H10 | -2.2085702251 | -0.4545339805 | 4.6730830083  |
| P11 | 2.2899437969  | -0.0613830949 | 0.3453585899  |
| P12 | -2.3142638883 | 0.0720763071  | 0.2536265649  |
| C13 | -3.4607809269 | -1.1403507892 | -0.6844214498 |
| C14 | -3.0720642276 | 1.8270410993  | 0.3318431955  |
| C15 | 3.0396615851  | -1.8197462415 | 0.4191957136  |
| C16 | 3.4756952742  | 1.1657537313  | -0.5218996808 |
| C22 | 2.3531859161  | 0.5460406134  | 2.1046393645  |
| C23 | -2.4465270825 | -0.5701508891 | 1.9968126467  |
| H17 | 3.2282068895  | 0.2096193809  | 2.6697493156  |
| H18 | 2.4280680059  | 1.6377632141  | 2.0275580466  |
| H19 | -3.3453528275 | -0.2482105849 | 2.5322894361  |
| H20 | -2.5130897693 | -1.6604993858 | 1.8950430800  |
| C24 | 2.8077564796  | -2.5200828237 | -0.9370454772 |
| H25 | 3.3827580573  | -2.0683948991 | -1.7481694358 |
| H26 | 3.1171535676  | -3.5702082772 | -0.8558244334 |
| H27 | 1.7524841091  | -2.4902704349 | -1.2204519459 |
| C28 | 4.5331810225  | -1.8770038013 | 0.7897473000  |
| H29 | 5.1726224035  | -1.4540819807 | 0.0110479008  |
| H30 | 4.7526421109  | -1.3637006200 | 1.7324304892  |
| H31 | 4.8308952682  | -2.9257594816 | 0.9177134089  |
| C32 | 2.2367231267  | -2.5934878824 | 1.4901562483  |
| H33 | 2.5538016964  | -3.6437270590 | 1.4812424195  |
| H34 | 2.4061654726  | -2.2099736275 | 2.5016438102  |
| H35 | 1.1638490258  | -2.5561027524 | 1.2804202259  |
| C36 | 4.7272635768  | 1.5107025400  | 0.3157184096  |
| H37 | 4.4780659336  | 1.9880748907  | 1.2681956127  |
| H38 | 5.3543372330  | 0.6423622586  | 0.5250443221  |
| H39 | 5.3389159111  | 2.2262234066  | -0.2480128775 |
| C40 | 3.9237140390  | 0.6236699246  | -1.8950176760 |
| H41 | 4.6059958908  | -0.2261155159 | -1.8012623493 |
| H42 | 3.0716386743  | 0.3277835528  | -2.5121663828 |
| H43 | 4.4653735863  | 1.4154537244  | -2.4278564373 |
| C44 | 2.6685210942  | 2.4645335745  | -0.7498088565 |
| H45 | 3.3209785962  | 3.2091671669  | -1.2240227256 |
| H46 | 1.8069903129  | 2.2908016683  | -1.3973779819 |
| H47 | 2.3032781089  | 2.8983112414  | 0.1876793594  |
| C48 | -2.6407425780 | -2.4319666452 | -0.9065836120 |
| H49 | -2.3105666761 | -2.8833933672 | 0.0355889412  |
| H50 | -3.2715543208 | -3.1687397242 | -1.4206660597 |
| H51 | -1.7552874823 | -2.2426897754 | -1.5164601916 |
| C52 | -4.7428512920 | -1.5054110864 | 0.0964757962  |
| H53 | -4.5292578454 | -2.0035762464 | 1.0469784591  |

Electronic Supplementary Information for Dalton Transactions  
This journal is © The Royal Society of Chemistry 2010

|     |               |               |               |
|-----|---------------|---------------|---------------|
| H54 | -5.3792248280 | -0.6425936545 | 0.3007446257  |
| H55 | -5.3308625636 | -2.2089773566 | -0.5060898927 |
| C56 | -3.8564876185 | -0.5718192818 | -2.0629040819 |
| H57 | -4.3734061655 | -1.3543599935 | -2.6326705326 |
| H58 | -4.5454091054 | 0.2736522684  | -1.9790673468 |
| H59 | -2.9818441312 | -0.2606445862 | -2.6397316375 |
| C60 | -2.7889543732 | 2.5546300223  | -1.0000874556 |
| H61 | -3.3298496587 | 2.1175087248  | -1.8420869272 |
| H62 | -3.1048365999 | 3.6021062221  | -0.9104803342 |
| H63 | -1.7231643050 | 2.5331653464  | -1.2419787955 |
| C64 | -2.3143850832 | 2.5813057231  | 1.4486970019  |
| H65 | -1.2338434816 | 2.5495235708  | 1.2814100145  |
| H66 | -2.6332344016 | 3.6310189692  | 1.4471852344  |
| H67 | -2.5232766192 | 2.1780621928  | 2.4450651130  |
| C68 | -4.5792453740 | 1.8731301885  | 0.6441169639  |
| H69 | -4.8853078320 | 2.9183722751  | 0.7807010968  |
| H70 | -5.1859204260 | 1.4638690734  | -0.1674395465 |
| H71 | -4.8341152533 | 1.3407243272  | 1.5671613144  |
| I72 | 0.0468694745  | 0.0408348740  | -2.6820998484 |

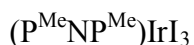

E(SCF) = -1306.86049203421

|     |               |               |               |
|-----|---------------|---------------|---------------|
| Ir1 | 0.2618433890  | -0.8140126590 | 0.0091621200  |
| N2  | 0.3058583069  | -0.1061046730 | 1.9976992852  |
| C3  | 1.4276543808  | 0.4968953000  | 2.4772919826  |
| C4  | 1.4794040919  | 0.9527545122  | 3.7936944172  |
| C5  | 0.3648189452  | 0.8224659860  | 4.6147388142  |
| C6  | -0.7798057350 | 0.2200922967  | 4.1045643206  |
| C7  | -0.7872045837 | -0.2560004853 | 2.7942723143  |
| H8  | 2.3872574180  | 1.4233975474  | 4.1550223856  |
| H9  | 0.3879144777  | 1.1852310984  | 5.6377134964  |
| H10 | -1.6658145015 | 0.0952946275  | 4.7175076135  |
| C11 | 2.5925519341  | 0.7196482442  | 1.5401636270  |
| H12 | 2.4742316297  | 1.7167194462  | 1.0959522383  |
| H13 | 3.5386936587  | 0.7078124678  | 2.0908661860  |
| C14 | -1.9856058668 | -1.0026658560 | 2.2544240763  |
| H15 | -1.8724036565 | -2.0579877390 | 2.5352813988  |
| H16 | -2.9091231847 | -0.6313128971 | 2.7103508449  |
| P17 | 2.5707285824  | -0.4576182684 | 0.1008968433  |
| P18 | -2.0364840091 | -0.9978896980 | 0.3956311918  |
| C19 | -2.9708853233 | -2.4967961309 | -0.0739363653 |
| H20 | -2.4204935462 | -3.3852913390 | 0.2390693942  |
| H21 | -3.9718190769 | -2.4915417003 | 0.3686503613  |
| H22 | -3.0543470668 | -2.5126096070 | -1.1641260003 |
| C23 | -3.1965975253 | 0.3492228734  | -0.0426266726 |

Electronic Supplementary Information for Dalton Transactions  
This journal is © The Royal Society of Chemistry 2010

|     |               |               |               |
|-----|---------------|---------------|---------------|
| H24 | -2.8329994321 | 1.3018298248  | 0.3454941088  |
| H25 | -3.2497414093 | 0.4322575150  | -1.1312188765 |
| H26 | -4.1934591384 | 0.1333087360  | 0.3554764132  |
| C27 | 3.7330618691  | -1.7942753169 | 0.5639559790  |
| H28 | 3.4000678014  | -2.2832903502 | 1.4806311597  |
| H29 | 3.7435628979  | -2.5463422153 | -0.2291810845 |
| H30 | 4.7416278502  | -1.3888414482 | 0.6952859687  |
| C31 | 3.4631502854  | 0.3981352244  | -1.2453500332 |
| H32 | 3.5043547025  | -0.2778219524 | -2.1039151934 |
| H33 | 2.9113601633  | 1.2917975905  | -1.5408370603 |
| H34 | 4.4803152424  | 0.6610183763  | -0.9386535227 |
| I35 | 0.5316924051  | -3.4026100005 | 0.9957304943  |
| I39 | 0.2049806512  | -1.7285450802 | -2.5584756123 |
| I43 | -0.0051106411 | 1.8202796981  | -0.8483614912 |

(P<sup>Me</sup>NP<sup>Me</sup>)IrI

E(SCF) = -1284.01479256409

|     |               |               |               |
|-----|---------------|---------------|---------------|
| Ir1 | 0.2391281198  | -0.7728289195 | -0.0218106988 |
| N2  | 0.2883144530  | -0.1261032538 | 1.9243453150  |
| C3  | 1.4008526487  | 0.5021005462  | 2.4374595587  |
| C4  | 1.4529524015  | 0.9314724217  | 3.7595819286  |
| C5  | 0.3547017359  | 0.7661571512  | 4.5989438970  |
| C6  | -0.7773493700 | 0.1464409189  | 4.0768510721  |
| C7  | -0.7907342071 | -0.3042446711 | 2.7608917360  |
| H8  | 2.3569398143  | 1.4153534465  | 4.1155035913  |
| H9  | 0.3801802114  | 1.1096917717  | 5.6280487956  |
| H10 | -1.6573061986 | -0.0132944208 | 4.6918166696  |
| C11 | 2.5543405227  | 0.7621199418  | 1.4992032106  |
| H12 | 2.4385626630  | 1.7677254727  | 1.0717956851  |
| H13 | 3.5078649826  | 0.7492080356  | 2.0389028797  |
| C14 | -1.9811892137 | -1.0572172493 | 2.2184468282  |
| H15 | -1.8686087574 | -2.1204452740 | 2.4717388895  |
| H16 | -2.9094015751 | -0.7107809087 | 2.6864740333  |
| P17 | 2.4825469104  | -0.3969944176 | 0.0485050250  |
| P18 | -1.9931382529 | -0.9958881448 | 0.3612596179  |
| C19 | -2.9706573849 | -2.4689792929 | -0.1309267052 |
| H20 | -2.4534059823 | -3.3716852304 | 0.2035269302  |
| H21 | -3.9861524962 | -2.4490981177 | 0.2787155425  |
| H22 | -3.0172513236 | -2.4980535845 | -1.2229414021 |
| C23 | -3.1217747812 | 0.3976019935  | -0.0536877489 |
| H24 | -2.7047207341 | 1.3264438259  | 0.3439476291  |
| H25 | -3.1759702125 | 0.4914964274  | -1.1419143339 |
| H26 | -4.1303040756 | 0.2468348041  | 0.3468988200  |
| C27 | 3.6155812422  | -1.7770048620 | 0.4952938509  |
| H28 | 3.2341588459  | -2.2784473735 | 1.3885198640  |
| H29 | 3.6211674319  | -2.5033089075 | -0.3222746976 |

Electronic Supplementary Information for Dalton Transactions  
This journal is © The Royal Society of Chemistry 2010

|     |              |               |               |
|-----|--------------|---------------|---------------|
| H30 | 4.6385964165 | -1.4298626734 | 0.6776193029  |
| C31 | 3.4109724629 | 0.4772148093  | -1.2712804315 |
| H32 | 3.4082323146 | -0.1529653703 | -2.1647983375 |
| H33 | 2.8931802101 | 1.4070948622  | -1.5192921844 |
| H34 | 4.4439354428 | 0.6935345306  | -0.9786779883 |
| I39 | 0.1736692808 | -1.6206946103 | -2.5845578818 |

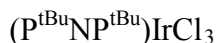

E(SCF) = -3124.81516577335

|      |               |               |               |
|------|---------------|---------------|---------------|
| Ir1  | -0.0061613223 | 0.0153540106  | -0.0257575616 |
| N2   | -0.0498395732 | -0.0059440910 | 2.0405665041  |
| C3   | 1.0535901819  | 0.3749039603  | 2.7399059765  |
| C4   | 1.0373571498  | 0.3711380694  | 4.1343665488  |
| C5   | -0.1088672312 | -0.0339937932 | 4.8108747520  |
| C6   | -1.2250677695 | -0.4249212440 | 4.0781811541  |
| C7   | -1.1819243588 | -0.4004121010 | 2.6844797318  |
| H8   | 1.9250443937  | 0.6815070665  | 4.6748702861  |
| H9   | -0.1319806454 | -0.0449709176 | 5.8964869093  |
| H10  | -2.1348080009 | -0.7458492572 | 4.5740228416  |
| P11  | 2.4051594529  | -0.0892151060 | 0.3303996619  |
| P12  | -2.4295057618 | 0.1135338894  | 0.2297282989  |
| C13  | -3.6137151515 | -0.8883179013 | -0.9217280002 |
| C14  | -3.3026474937 | 1.7733859958  | 0.7088254729  |
| C15  | 3.2584003473  | -1.7585152922 | 0.8128991231  |
| C16  | 3.6369354804  | 0.9366867403  | -0.7481345727 |
| C117 | -0.1879576952 | -2.4141727072 | 0.0177462794  |
| C121 | 0.1730101601  | 2.4433788697  | 0.0751430122  |
| C22  | 2.2824938359  | 0.8015555843  | 1.9702581509  |
| C23  | -2.3767215808 | -0.8109081114 | 1.8546987339  |
| H17  | 3.1738555973  | 0.7010850250  | 2.5952985857  |
| H18  | 2.1659420783  | 1.8581045878  | 1.7023393309  |
| H19  | -3.2940456736 | -0.7232025373 | 2.4430292243  |
| H20  | -2.2479239026 | -1.8617271854 | 1.5703469174  |
| C24  | 3.1780047205  | -2.7740106881 | -0.3503156086 |
| H25  | 3.7791388600  | -2.4758669659 | -1.2096187360 |
| H26  | 3.5710196575  | -3.7352381724 | 0.0044880196  |
| H27  | 2.1513995125  | -2.9293796882 | -0.6799423976 |
| C28  | 4.7378378325  | -1.5890925224 | 1.2247001365  |
| H29  | 5.3883844666  | -1.3122466771 | 0.3943011042  |
| H30  | 4.8742354901  | -0.8626106188 | 2.0325720628  |
| H31  | 5.0936324861  | -2.5557500051 | 1.6020760732  |
| C32  | 2.5352637019  | -2.3516896654 | 2.0456066565  |
| H33  | 2.9600516957  | -3.3443293818 | 2.2385997766  |
| H34  | 2.7024830948  | -1.7539843351 | 2.9467834968  |
| H35  | 1.4658640486  | -2.4775535728 | 1.8831034876  |
| C36  | 4.7962622011  | 1.5202571800  | 0.0907904231  |

Electronic Supplementary Information for Dalton Transactions  
This journal is © The Royal Society of Chemistry 2010

|      |               |               |               |
|------|---------------|---------------|---------------|
| H37  | 4.4325374969  | 2.2107634942  | 0.8581062866  |
| H38  | 5.4213205587  | 0.7695202205  | 0.5722540590  |
| H39  | 5.4410435854  | 2.1018419399  | -0.5792096328 |
| C40  | 4.1832745856  | 0.0365379794  | -1.8799711523 |
| H41  | 4.8482336298  | -0.7524712813 | -1.5256595209 |
| H42  | 3.3715306954  | -0.4138983919 | -2.4590685140 |
| H43  | 4.7648137423  | 0.6649654128  | -2.5646456709 |
| C44  | 2.9338033254  | 2.1253019139  | -1.4364466204 |
| H45  | 3.6647499426  | 2.5854953282  | -2.1137122733 |
| H46  | 2.0676925225  | 1.8135091136  | -2.0205692793 |
| H47  | 2.6086258258  | 2.8848553154  | -0.7270117640 |
| C48  | -2.8809469910 | -2.0614581570 | -1.6056039222 |
| H49  | -2.5863843744 | -2.8371088094 | -0.9001823175 |
| H50  | -3.5816957891 | -2.5057178071 | -2.3241674374 |
| H51  | -1.9902227700 | -1.7368755814 | -2.1441906914 |
| C52  | -4.8064904106 | -1.4895693169 | -0.1442434447 |
| H53  | -4.4744530836 | -2.1979663236 | 0.6211491401  |
| H54  | -5.4505302923 | -0.7493132034 | 0.3284716235  |
| H55  | -5.4236305676 | -2.0548934507 | -0.8530760557 |
| C56  | -4.1137111529 | 0.0359312407  | -2.0555003172 |
| H57  | -4.6642061335 | -0.5780163084 | -2.7778917555 |
| H58  | -4.7948669977 | 0.8160346519  | -1.7127423304 |
| H59  | -3.2792051649 | 0.5003003901  | -2.5893263770 |
| C60  | -3.1724761068 | 2.8114868348  | -0.4296798239 |
| H61  | -3.7361807735 | 2.5308734603  | -1.3197455344 |
| H62  | -3.5803433058 | 3.7658973601  | -0.0732101227 |
| H63  | -2.1326444539 | 2.9725226235  | -0.7117836278 |
| C64  | -2.6328426092 | 2.3417787581  | 1.9826627666  |
| H65  | -1.5574150154 | 2.4696375520  | 1.8686215777  |
| H66  | -3.0653075736 | 3.3309688068  | 2.1763669600  |
| H67  | -2.8387507448 | 1.7270411442  | 2.8641561014  |
| C68  | -4.7982927594 | 1.5969699949  | 1.0539458959  |
| H69  | -5.1706601117 | 2.5572682176  | 1.4316394190  |
| H70  | -5.4126732805 | 1.3337170626  | 0.1921328879  |
| H71  | -4.9685675655 | 0.8574865453  | 1.8433819676  |
| Cl72 | 0.0448493089  | 0.0409865276  | -2.4388189717 |

(P<sup>tBu</sup>NP<sup>tBu</sup>)\*IrCl<sub>2</sub>

E(SCF) = -2663.96912174219

|     |               |               |               |
|-----|---------------|---------------|---------------|
| Ir1 | 0.0249422008  | -0.1481078990 | -0.0437214091 |
| N2  | 0.0990362750  | 0.3330753517  | 1.9777378760  |
| C3  | 1.1646347762  | -0.0585205623 | 2.7305436516  |
| C4  | 1.2279987205  | 0.2303514436  | 4.0932385233  |
| C5  | 0.1960141985  | 0.9381859264  | 4.6983258355  |
| C6  | -0.8587708668 | 1.3831880870  | 3.9088320686  |
| C7  | -0.8797307037 | 1.0934688977  | 2.5453640272  |

Electronic Supplementary Information for Dalton Transactions  
This journal is © The Royal Society of Chemistry 2010

|      |               |               |               |
|------|---------------|---------------|---------------|
| H8   | 2.0854895874  | -0.1085355054 | 4.6646211147  |
| H9   | 0.2229085586  | 1.1567927930  | 5.7614975315  |
| H10  | -1.6643048545 | 1.9722421631  | 4.3340237107  |
| P11  | 2.2762786819  | -0.5165345222 | 0.2159868661  |
| P12  | -2.2277198529 | 0.6645484629  | 0.1214597473  |
| C13  | -3.6226734633 | -0.5467149489 | 0.6353048006  |
| C14  | -2.9006855279 | 1.9322341763  | -1.1456935998 |
| C15  | 3.4869030324  | -1.7928767168 | -0.4758655610 |
| C16  | 2.6079298503  | 1.3093755203  | -0.1600778683 |
| C117 | -0.4564696493 | -2.6145193458 | 0.5407981165  |
| C22  | 2.2762184798  | -0.8143127714 | 2.0518115472  |
| C23  | -1.9441552323 | 1.6838501926  | 1.6537554021  |
| H17  | 2.0479135195  | -1.8841106452 | 2.1315657565  |
| H18  | 3.2296117293  | -0.6283925097 | 2.5556341561  |
| H19  | -1.5712670771 | 2.6519525847  | 1.2948349911  |
| H20  | -2.8526544812 | 1.8879591709  | 2.2272379949  |
| C24  | 3.3889150927  | -1.8161851253 | -2.0167029202 |
| H25  | 3.7656759721  | -0.8993267519 | -2.4732008273 |
| H26  | 4.0014993111  | -2.6455359700 | -2.3905181857 |
| H27  | 2.3594596190  | -1.9658724499 | -2.3512537422 |
| C28  | 4.9263360040  | -1.4619632961 | -0.0285585615 |
| H29  | 5.2709765218  | -0.4958170210 | -0.4076456251 |
| H30  | 5.0310933673  | -1.4595263287 | 1.0620353578  |
| H31  | 5.6062630757  | -2.2301563650 | -0.4171871841 |
| C32  | 3.0897498305  | -3.1908916541 | 0.0525660130  |
| H33  | 3.7012395528  | -3.9391522922 | -0.4661052593 |
| H34  | 3.2865033794  | -3.3034314919 | 1.1235210006  |
| H35  | 2.0351859436  | -3.4129817435 | -0.1291316259 |
| C36  | 3.3153739355  | 2.0727217400  | 0.9706637467  |
| H37  | 2.8063426638  | 1.9670335728  | 1.9335186147  |
| H38  | 4.3542619182  | 1.7447069651  | 1.0965982641  |
| H39  | 3.3343591860  | 3.1431011322  | 0.7291739623  |
| C40  | 3.3516104115  | 1.5555659894  | -1.4838543264 |
| H41  | 4.3965019526  | 1.2294169293  | -1.4524806715 |
| H42  | 2.8503438611  | 1.0690480241  | -2.3238532439 |
| H43  | 3.3501904302  | 2.6347839631  | -1.6820808514 |
| C44  | 1.0877386142  | 1.6838742274  | -0.3315418015 |
| H45  | 0.9200704657  | 2.0817863075  | -1.3318935326 |
| H47  | 0.7981716068  | 2.4442233775  | 0.4052257010  |
| C48  | -3.2308310104 | -1.1593604892 | 2.0005278984  |
| H49  | -3.2675364187 | -0.4219561655 | 2.8101766093  |
| H50  | -3.9613702446 | -1.9397923823 | 2.2466549511  |
| H51  | -2.2469301452 | -1.6301475166 | 1.9722415929  |
| C52  | -5.0078905715 | 0.1085604761  | 0.8089390281  |
| H53  | -4.9976684077 | 0.9419107386  | 1.5202581757  |
| H54  | -5.4362577981 | 0.4593652647  | -0.1322698698 |
| H55  | -5.6940241415 | -0.6465659702 | 1.2122920192  |

Electronic Supplementary Information for Dalton Transactions  
This journal is © The Royal Society of Chemistry 2010

|      |               |               |               |
|------|---------------|---------------|---------------|
| C56  | -3.7166045118 | -1.6794207373 | -0.4116719039 |
| H57  | -4.4506950888 | -2.4167590592 | -0.0626152458 |
| H58  | -4.0528288022 | -1.3189370457 | -1.3863024305 |
| H59  | -2.7590013837 | -2.1880112499 | -0.5353611276 |
| C60  | -3.5515933141 | 1.1837307729  | -2.3296562991 |
| H61  | -4.4928380084 | 0.7005892615  | -2.0576284708 |
| H62  | -3.7757759941 | 1.9085652479  | -3.1221348790 |
| H63  | -2.8744447812 | 0.4323489524  | -2.7458675061 |
| C64  | -1.7063811998 | 2.7298719325  | -1.7065449762 |
| H65  | -1.0087075991 | 2.0765187135  | -2.2316474390 |
| H66  | -2.0891543188 | 3.4730047466  | -2.4173270782 |
| H67  | -1.1614163765 | 3.2742192795  | -0.9289560936 |
| C68  | -3.8996764329 | 2.9423255418  | -0.5396045785 |
| H69  | -4.2069791115 | 3.6407314123  | -1.3277061838 |
| H70  | -4.8035029773 | 2.4787770165  | -0.1459084150 |
| H71  | -3.4484452628 | 3.5424202844  | 0.2575588789  |
| Cl72 | -0.0732713366 | -0.5714231374 | -2.4273036466 |

(P<sup>tBu</sup>NP<sup>tBu</sup>)IrCl

E(SCF) = -2204.34344554301

|      |               |               |               |
|------|---------------|---------------|---------------|
| Ir1  | -0.1514226561 | -0.3375123051 | 0.0656896449  |
| N2   | -0.0094492043 | 0.2648824341  | 2.0049631359  |
| C3   | 1.2129307124  | 0.4024926319  | 2.6246156357  |
| C4   | 1.3236996454  | 0.8110368955  | 3.9499884034  |
| C5   | 0.1877845164  | 1.1154564997  | 4.6937165878  |
| C6   | -1.0487552749 | 0.9848614957  | 4.0691219218  |
| C7   | -1.1319198738 | 0.5551928438  | 2.7486549710  |
| H8   | 2.3141066729  | 0.9005911270  | 4.3853221376  |
| H9   | 0.2635861601  | 1.4427977111  | 5.7257216748  |
| H10  | -1.9680275652 | 1.2010762851  | 4.6045054723  |
| C11  | 2.4520370697  | 0.1409803918  | 1.8076051362  |
| H12  | 2.8002944049  | 1.0967446260  | 1.3965114862  |
| H13  | 3.2582392769  | -0.2406666187 | 2.4427793953  |
| C14  | -2.4776294975 | 0.3464214281  | 2.1041185538  |
| H15  | -2.8257447801 | -0.6626790301 | 2.3580126945  |
| H16  | -3.2140293510 | 1.0454270050  | 2.5140383762  |
| P17  | 2.0667163663  | -0.9175289609 | 0.3244561701  |
| P18  | -2.3426535636 | 0.3634088056  | 0.2471301839  |
| C19  | -3.7627218237 | -0.7891737461 | -0.2923719693 |
| C20  | -2.6706781040 | 2.1766865619  | -0.2542721937 |
| C21  | 2.3757447421  | -2.7112836272 | 0.9027474867  |
| C22  | 3.3670551103  | -0.3506230722 | -0.9507459473 |
| Cl23 | -0.3187086259 | -1.0426521727 | -2.2438131971 |
| C25  | 1.5655012303  | -2.8952575394 | 2.2066479451  |
| H26  | 1.9586375456  | -2.2969151736 | 3.0349912277  |

Electronic Supplementary Information for Dalton Transactions  
This journal is © The Royal Society of Chemistry 2010

|     |               |               |               |
|-----|---------------|---------------|---------------|
| H27 | 0.5144370343  | -2.6321727626 | 2.0567511630  |
| H28 | 1.6168318935  | -3.9481401273 | 2.5104744937  |
| C29 | 3.8479710079  | -3.0635376581 | 1.1827598899  |
| H30 | 4.3143999446  | -2.3779000278 | 1.8990331727  |
| H31 | 3.9017697783  | -4.0700776706 | 1.6174752999  |
| H32 | 4.4531842489  | -3.0730783888 | 0.2727170525  |
| C33 | 4.7780371061  | -0.1444266197 | -0.3600934909 |
| H34 | 4.7926550086  | 0.6069387211  | 0.4360086916  |
| H35 | 5.2136588926  | -1.0642856256 | 0.0343511247  |
| H36 | 5.4435823566  | 0.2180948587  | -1.1535989550 |
| C37 | 1.7907218486  | -3.6764752847 | -0.1519134314 |
| H38 | 1.8314054833  | -4.7020435347 | 0.2375701700  |
| H39 | 0.7491835008  | -3.4296673496 | -0.3747837116 |
| H40 | 2.3453700926  | -3.6582716546 | -1.0924345615 |
| C41 | 3.4354924621  | -1.3533035501 | -2.1217159293 |
| H42 | 3.9021716363  | -2.2990625158 | -1.8309417850 |
| H43 | 2.4424823449  | -1.5570096711 | -2.5317090317 |
| H44 | 4.0501202071  | -0.9223770988 | -2.9221173818 |
| C45 | 2.8618920300  | 1.0012382456  | -1.5071193908 |
| H46 | 3.5802148190  | 1.3683023738  | -2.2517359700 |
| H47 | 1.8850911017  | 0.8939569415  | -1.9830526845 |
| H48 | 2.7769400016  | 1.7678997403  | -0.7290205246 |
| C49 | -3.2618160413 | -2.2325100575 | -0.0526183539 |
| H50 | -3.0350844893 | -2.4267353584 | 1.0015468217  |
| H51 | -4.0500202983 | -2.9350945161 | -0.3532076548 |
| H52 | -2.3623540814 | -2.4416280523 | -0.6351442078 |
| C53 | -5.0726520472 | -0.5841889361 | 0.4980850385  |
| H54 | -4.9445307130 | -0.7547273999 | 1.5718700404  |
| H55 | -5.5016345887 | 0.4102948683  | 0.3619913420  |
| H56 | -5.8152179703 | -1.3111750696 | 0.1457750348  |
| C57 | -2.2831285681 | 2.3561476921  | -1.7386412561 |
| H58 | -2.9564025121 | 1.8267060150  | -2.4160105834 |
| H59 | -2.3261568772 | 3.4227947262  | -1.9946979603 |
| H60 | -1.2689289197 | 1.9935376454  | -1.9265408737 |
| C61 | -4.1102207509 | 2.6698338957  | -0.0201868763 |
| H62 | -4.8300031716 | 2.1803071924  | -0.6811342892 |
| H63 | -4.4400719478 | 2.5254849721  | 1.0147410821  |
| H64 | -4.1610096052 | 3.7465668861  | -0.2277170464 |
| C65 | -1.7066895017 | 3.0421732095  | 0.5897104465  |
| H66 | -1.7733479437 | 4.0827512740  | 0.2487419341  |
| H67 | -1.9551727401 | 3.0315191466  | 1.6559518191  |
| H68 | -0.6719022306 | 2.7078666284  | 0.4713075057  |
| C69 | -4.0372013298 | -0.6237131814 | -1.8019342663 |
| H70 | -4.7246704084 | -1.4151332675 | -2.1261688781 |
| H71 | -4.5148626187 | 0.3327863445  | -2.0338534898 |
| H72 | -3.1182591443 | -0.7144790768 | -2.3875334922 |



Electronic Supplementary Information for Dalton Transactions  
This journal is © The Royal Society of Chemistry 2010

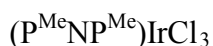

E(SCF) = -2653.35508626093

|      |               |               |               |
|------|---------------|---------------|---------------|
| Ir1  | 0.2613498036  | -0.8150597846 | 0.0056132581  |
| N2   | 0.3053103083  | -0.1184266209 | 1.9669027371  |
| C3   | 1.4165783049  | 0.5120306677  | 2.4369510829  |
| C4   | 1.4682961256  | 0.9692827009  | 3.7528927093  |
| C5   | 0.3638173600  | 0.8112008019  | 4.5834497857  |
| C6   | -0.7704273598 | 0.1802400331  | 4.0833037749  |
| C7   | -0.7774314907 | -0.2956431755 | 2.7730051443  |
| H8   | 2.3674399434  | 1.4615957977  | 4.1070849039  |
| H9   | 0.3866744681  | 1.1745734155  | 5.6062673474  |
| H10  | -1.6477642548 | 0.0342630709  | 4.7040229838  |
| C11  | 2.5667213265  | 0.7512275745  | 1.4851153820  |
| H12  | 2.4058722287  | 1.7252260455  | 1.0053160987  |
| H13  | 3.5168147943  | 0.7943398732  | 2.0271686011  |
| C14  | -1.9610385215 | -1.0651844923 | 2.2317240815  |
| H15  | -1.8057779668 | -2.1258380062 | 2.4673923754  |
| H16  | -2.8881317277 | -0.7433674436 | 2.7167266781  |
| P17  | 2.5599192630  | -0.4687423528 | 0.0836345209  |
| P18  | -2.0268569453 | -1.0016558626 | 0.3758717228  |
| C19  | -2.9201287788 | -2.5049550286 | -0.1392107184 |
| H20  | -2.3247092968 | -3.3750068917 | 0.1451577606  |
| H21  | -3.9187490578 | -2.5591617799 | 0.3053189839  |
| H22  | -3.0030537750 | -2.4918136645 | -1.2293268084 |
| C23  | -3.1327127055 | 0.3874908509  | -0.0509501492 |
| H24  | -2.7068425965 | 1.3195127990  | 0.3256549676  |
| H25  | -3.1856910441 | 0.4676053147  | -1.1399633877 |
| H26  | -4.1372930589 | 0.2340075489  | 0.3559527426  |
| C27  | 3.6684041028  | -1.8309848358 | 0.5841970693  |
| H28  | 3.2713044064  | -2.3116483686 | 1.4803791872  |
| H29  | 3.6800947421  | -2.5799856402 | -0.2120682764 |
| H30  | 4.6857361268  | -1.4686454741 | 0.7632794327  |
| C31  | 3.4111584773  | 0.3617381200  | -1.2981211086 |
| H32  | 3.4522523064  | -0.3365937993 | -2.1383752777 |
| H33  | 2.8149430840  | 1.2243575473  | -1.6028295358 |
| H34  | 4.4252952077  | 0.6707650967  | -1.0263925509 |
| Cl35 | 0.4846544146  | -3.0838778723 | 0.8736886188  |
| Cl39 | 0.2100612684  | -1.6206618857 | -2.2615033663 |
| Cl43 | 0.0407854699  | 1.4957986201  | -0.7434584852 |

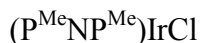

E(SCF) = -1732.84412030560

|     |              |               |              |
|-----|--------------|---------------|--------------|
| Ir1 | 0.2615292093 | -0.8142336464 | 0.0085304995 |
|-----|--------------|---------------|--------------|

Electronic Supplementary Information for Dalton Transactions  
This journal is © The Royal Society of Chemistry 2010

|      |               |               |               |
|------|---------------|---------------|---------------|
| N2   | 0.3042705406  | -0.1330515215 | 1.9266010336  |
| C3   | 1.4184449229  | 0.4992413654  | 2.4358044896  |
| C4   | 1.4667019704  | 0.9526844017  | 3.7495246503  |
| C5   | 0.3638225823  | 0.8117352277  | 4.5872639918  |
| C6   | -0.7694093961 | 0.1898392037  | 4.0704771402  |
| C7   | -0.7798009737 | -0.2870085498 | 2.7642104740  |
| H8   | 2.3724683161  | 1.4374281719  | 4.0999180262  |
| H9   | 0.3867079014  | 1.1747513874  | 5.6096071511  |
| H10  | -1.6536715517 | 0.0474008988  | 4.6836384806  |
| C11  | 2.5790782188  | 0.7364461360  | 1.4989919731  |
| H12  | 2.4708970618  | 1.7340681073  | 1.0511865822  |
| H13  | 3.5292711499  | 0.7291641389  | 2.0445772183  |
| C14  | -1.9733628723 | -1.0451294126 | 2.2335312767  |
| H15  | -1.8691994896 | -2.1032619897 | 2.5108978163  |
| H16  | -2.9011619629 | -0.6819623609 | 2.6894925261  |
| P17  | 2.5081860272  | -0.4503742088 | 0.0725317374  |
| P18  | -1.9754100388 | -1.0239205937 | 0.3766547727  |
| C19  | -2.9245100161 | -2.5181304001 | -0.1063373256 |
| H20  | -2.4036294859 | -3.4070895693 | 0.2578553320  |
| H21  | -3.9507283927 | -2.5053551547 | 0.2760512627  |
| H22  | -2.9422992619 | -2.5680434663 | -1.1986134835 |
| C23  | -3.1140975922 | 0.3475354428  | -0.0819206005 |
| H24  | -2.7109747000 | 1.2904007055  | 0.2966500670  |
| H25  | -3.1591251092 | 0.4144986156  | -1.1726172688 |
| H26  | -4.1249115986 | 0.1959202365  | 0.3126354433  |
| C27  | 3.6485579753  | -1.8189746859 | 0.5355380739  |
| H28  | 3.2750348263  | -2.3070294125 | 1.4394777097  |
| H29  | 3.6515387547  | -2.5589216318 | -0.2698092272 |
| H30  | 4.6717155805  | -1.4658176304 | 0.7052870447  |
| C31  | 3.4155980577  | 0.3926288322  | -1.2813343114 |
| H32  | 3.3909397282  | -0.2576791869 | -2.1601813284 |
| H33  | 2.8957047663  | 1.3185870045  | -1.5392770273 |
| H34  | 4.4557556070  | 0.6110575218  | -1.0170564003 |
| Cl39 | 0.2108010627  | -1.6161977200 | -2.2522880935 |

(P<sup>tBu</sup>NP<sup>tBu</sup>)Ir(OH)<sub>3</sub>

E(SCF) = -1971.54236640380

|     |               |               |               |
|-----|---------------|---------------|---------------|
| Ir1 | 3.3966306464  | 0.8192243925  | -0.0495072874 |
| N2  | 1.3189994664  | 0.8622938477  | -0.0295047202 |
| C3  | 0.6469683322  | 1.9702262311  | 0.3813284086  |
| C4  | -0.7456854634 | 2.0150870828  | 0.3500418714  |
| C5  | -1.4585173613 | 0.9129219143  | -0.1147490534 |
| C6  | -0.7586129398 | -0.2147906322 | -0.5342030986 |
| C7  | 0.6347423166  | -0.2229710751 | -0.4817361858 |
| H8  | -1.2561733280 | 2.9107466818  | 0.6879450064  |
| H9  | -2.5437659907 | 0.9326906621  | -0.1490533905 |

Electronic Supplementary Information for Dalton Transactions  
This journal is © The Royal Society of Chemistry 2010

|     |               |               |               |
|-----|---------------|---------------|---------------|
| H10 | -1.2800101896 | -1.0917516619 | -0.9031162427 |
| C11 | 1.4802916578  | 3.1190596781  | 0.8849970125  |
| H12 | 0.9056449470  | 4.0496921081  | 0.8916574096  |
| H13 | 1.7790865303  | 2.8839832606  | 1.9117576833  |
| C14 | 1.4455217535  | -1.4110492975 | -0.9300135532 |
| H15 | 0.8370680699  | -2.3190870104 | -0.9426245961 |
| H16 | 1.8039972315  | -1.1906772069 | -1.9445380291 |
| P17 | 3.1022262759  | 3.1986219769  | -0.0378671206 |
| P18 | 3.0427719122  | -1.5250065628 | 0.0286800467  |
| C19 | 2.5879900991  | -2.2895655159 | 1.7231432260  |
| C20 | 4.1205968481  | -2.7425585007 | -0.9865132720 |
| C21 | 4.2816987835  | 4.2695979105  | 1.0460959446  |
| C22 | 2.6838204637  | 4.0704643324  | -1.6884947814 |
| O23 | 3.2595928895  | 0.6547297694  | -2.1399141263 |
| H24 | 4.1797625711  | 0.5948869379  | -2.4252755780 |
| O26 | 3.5658164110  | 0.9722134383  | 2.0322333639  |
| H27 | 4.5279854588  | 0.8816168435  | 2.1135440451  |
| C28 | 1.6438625817  | 3.2017763596  | -2.4367343681 |
| H29 | 2.0030363692  | 2.1754206249  | -2.5542777547 |
| H30 | 0.6701926518  | 3.2083230283  | -1.9369516472 |
| H31 | 1.4942982175  | 3.6407364784  | -3.4321043567 |
| C32 | 2.0850630833  | 5.4875874567  | -1.5538446543 |
| H33 | 1.2440861038  | 5.5199977092  | -0.8525950911 |
| H34 | 2.8081621266  | 6.2436943216  | -1.2528581807 |
| H35 | 1.6915479037  | 5.7861656577  | -2.5333021288 |
| C36 | 3.9698840388  | 4.1055162933  | -2.5405346293 |
| H37 | 3.7469242564  | 4.5562318168  | -3.5157313420 |
| H38 | 4.7686917785  | 4.6975020599  | -2.0824931083 |
| H39 | 4.3317527576  | 3.0886657641  | -2.7168962336 |
| C40 | 4.2224647809  | 5.7905618075  | 0.8085658480  |
| H41 | 4.5720730717  | 6.0792284627  | -0.1857668352 |
| H42 | 3.2208916908  | 6.2023108732  | 0.9623470579  |
| H43 | 4.8874192650  | 6.2742830508  | 1.5356010832  |
| C44 | 3.9657377682  | 4.0130321542  | 2.5377745958  |
| H45 | 3.0374177757  | 4.5097685997  | 2.8425095680  |
| H46 | 3.8860542171  | 2.9433840243  | 2.7495172508  |
| H47 | 4.7744962443  | 4.4447397799  | 3.1410506328  |
| C48 | 5.7178124307  | 3.7791052180  | 0.7516748931  |
| H49 | 6.4213315530  | 4.3287565088  | 1.3896588519  |
| H50 | 5.8293835426  | 2.7101572657  | 0.9490199236  |
| H51 | 6.0088405750  | 3.9683053182  | -0.2880392515 |
| C52 | 4.8026421914  | -1.9586191865 | -2.1283135600 |
| H53 | 4.0783553942  | -1.5165457410 | -2.8140679330 |
| H54 | 5.4246904859  | -1.1585325767 | -1.7174747779 |
| H55 | 5.4366439202  | -2.6565123673 | -2.6907026029 |
| C56 | 3.2887693376  | -3.8870736967 | -1.6037740763 |
| H57 | 2.5464638149  | -3.5128536854 | -2.3151338871 |

Electronic Supplementary Information for Dalton Transactions  
This journal is © The Royal Society of Chemistry 2010

|     |              |               |               |
|-----|--------------|---------------|---------------|
| H58 | 3.9624768223 | -4.5495685445 | -2.1618274159 |
| H59 | 2.7732626421 | -4.4973508060 | -0.8594381441 |
| C60 | 5.2494593847 | -3.3274970980 | -0.1111552693 |
| H61 | 5.9280911519 | -3.8974352843 | -0.7579106043 |
| H62 | 5.8361084940 | -2.5367350916 | 0.3650724694  |
| H63 | 4.8865006397 | -4.0125823938 | 0.6581311343  |
| C64 | 2.0988596325 | -3.7483468874 | 1.6297272651  |
| H65 | 1.2498592821 | -3.8624888136 | 0.9465332684  |
| H66 | 2.8839246851 | -4.4422496634 | 1.3206192427  |
| H67 | 1.7581079819 | -4.0684457873 | 2.6226781747  |
| C68 | 1.4577869545 | -1.4372097230 | 2.3454466202  |
| H69 | 0.5229738370 | -1.4966430630 | 1.7806212888  |
| H70 | 1.2521744632 | -1.8288579760 | 3.3499483084  |
| H71 | 1.7755300702 | -0.3972197280 | 2.4431187168  |
| C72 | 3.7963284478 | -2.1851843883 | 2.6815106010  |
| H73 | 3.4941206553 | -2.5660158418 | 3.6658812631  |
| H74 | 4.6609547744 | -2.7654975981 | 2.3582613820  |
| H75 | 4.0797318169 | -1.1368610820 | 2.7914346126  |
| O76 | 5.4424887142 | 0.6144693598  | -0.0689368464 |
| H77 | 5.8178755653 | 1.3521488212  | -0.5633343370 |

(P<sup>tBu</sup>NP<sup>tBu</sup>)Ir(OH)

E(SCF) = -1819.90691657755

|     |               |               |               |
|-----|---------------|---------------|---------------|
| Ir1 | -0.1569733927 | -0.3338715980 | 0.0603603627  |
| N2  | -0.0001240816 | 0.2513771990  | 2.0106442395  |
| C3  | 1.2261274124  | 0.3948132087  | 2.6274470598  |
| C4  | 1.3463830082  | 0.7951731079  | 3.9522483210  |
| C5  | 0.2140125749  | 1.0907755823  | 4.7087047134  |
| C6  | -1.0272876429 | 0.9576554998  | 4.0891359237  |
| C7  | -1.1197936060 | 0.5348469312  | 2.7688628546  |
| H8  | 2.3401344955  | 0.8888363694  | 4.3800159611  |
| H9  | 0.2954942368  | 1.4129054631  | 5.7416708173  |
| H10 | -1.9436902903 | 1.1675955756  | 4.6327288998  |
| C11 | 2.4521430346  | 0.1517983937  | 1.7832719173  |
| H12 | 2.7667572731  | 1.1094702399  | 1.3485662632  |
| H13 | 3.2837751210  | -0.2081155070 | 2.3981021634  |
| C14 | -2.4702813751 | 0.3195925155  | 2.1272730708  |
| H15 | -2.8089140126 | -0.6974738275 | 2.3642574214  |
| H16 | -3.2123789455 | 1.0060119301  | 2.5482628113  |
| P17 | 2.0448257994  | -0.9275218331 | 0.3204073955  |
| P18 | -2.3392073669 | 0.3669127266  | 0.2719081294  |
| C19 | -3.7155900708 | -0.8038843097 | -0.3257469045 |
| C20 | -2.6811645039 | 2.1806983093  | -0.2152366023 |
| C21 | 2.3651205884  | -2.7145586332 | 0.9218873130  |
| C22 | 3.3406826689  | -0.3988121680 | -0.9857512974 |
| O23 | -0.4788364293 | -0.8417204167 | -1.8774199053 |

Electronic Supplementary Information for Dalton Transactions  
This journal is © The Royal Society of Chemistry 2010

|     |               |               |               |
|-----|---------------|---------------|---------------|
| H24 | 0.3252181004  | -1.1694342868 | -2.2937759329 |
| C25 | 1.5634107511  | -2.8792137702 | 2.2335060815  |
| H26 | 1.9647631128  | -2.2718502690 | 3.0509657538  |
| H27 | 0.5136149134  | -2.6089356087 | 2.0868080230  |
| H28 | 1.6099736708  | -3.9290483440 | 2.5496448993  |
| C29 | 3.8389561599  | -3.0637217981 | 1.1961688956  |
| H30 | 4.3076061725  | -2.3684670996 | 1.9011407760  |
| H31 | 3.8978532358  | -4.0644819850 | 1.6433006754  |
| H32 | 4.4415916839  | -3.0836028787 | 0.2843283591  |
| C33 | 4.7512318537  | -0.1449912636 | -0.4148981389 |
| H34 | 4.7544637604  | 0.6451374778  | 0.3420494313  |
| H35 | 5.1961251528  | -1.0387124747 | 0.0273730296  |
| H36 | 5.4140117708  | 0.1849269581  | -1.2252420428 |
| C37 | 1.7684115027  | -3.6957383239 | -0.1104881911 |
| H38 | 1.7966328285  | -4.7143769670 | 0.2969781579  |
| H39 | 0.7270252522  | -3.4416515657 | -0.3286356109 |
| H40 | 2.3221954603  | -3.7062217334 | -1.0523536393 |
| C41 | 3.4312119781  | -1.4479459955 | -2.1133706430 |
| H42 | 3.9044227752  | -2.3770423310 | -1.7854256274 |
| H43 | 2.4485463195  | -1.6948088224 | -2.5277104679 |
| H44 | 4.0376216493  | -1.0446386854 | -2.9339943450 |
| C45 | 2.8064602177  | 0.9143290578  | -1.6040792907 |
| H46 | 3.5128092984  | 1.2659719670  | -2.3678963787 |
| H47 | 1.8265891879  | 0.7658113921  | -2.0651012988 |
| H48 | 2.6991433380  | 1.7107471107  | -0.8603280497 |
| C49 | -3.1909029845 | -2.2394892429 | -0.0907800162 |
| H50 | -2.9845222158 | -2.4451022954 | 0.9650930276  |
| H51 | -3.9556575230 | -2.9544334992 | -0.4226133308 |
| H52 | -2.2721947106 | -2.4088684431 | -0.6563947096 |
| C53 | -5.0596782825 | -0.6330934712 | 0.4094543846  |
| H54 | -4.9674228412 | -0.8070004364 | 1.4867971657  |
| H55 | -5.5020005591 | 0.3542314816  | 0.2632192615  |
| H56 | -5.7743254236 | -1.3720763921 | 0.0250600981  |
| C57 | -2.2674017566 | 2.3808309024  | -1.6906604756 |
| H58 | -2.9499954203 | 1.8890732930  | -2.3871736132 |
| H59 | -2.2724079608 | 3.4535380971  | -1.9240246071 |
| H60 | -1.2639223283 | 1.9861529783  | -1.8729322005 |
| C61 | -4.1289359019 | 2.6570730455  | -0.0005647925 |
| H62 | -4.8310670840 | 2.1670048466  | -0.6799691328 |
| H63 | -4.4750006716 | 2.4949849684  | 1.0265669268  |
| H64 | -4.1890842604 | 3.7356951083  | -0.1959467451 |
| C65 | -1.7376860041 | 3.0424245738  | 0.6549519803  |
| H66 | -1.8062238188 | 4.0868696755  | 0.3264391404  |
| H67 | -2.0005149223 | 3.0148103041  | 1.7170509289  |
| H68 | -0.6991277410 | 2.7164035562  | 0.5478834867  |
| C69 | -3.9053104606 | -0.6239854672 | -1.8465267888 |
| H70 | -4.5478387390 | -1.4298668332 | -2.2239800742 |

Electronic Supplementary Information for Dalton Transactions  
This journal is © The Royal Society of Chemistry 2010

|     |               |               |               |
|-----|---------------|---------------|---------------|
| H71 | -4.3958152484 | 0.3217940886  | -2.0946440375 |
| H72 | -2.9433980567 | -0.6807941138 | -2.3652421235 |

(P<sup>Me</sup>NP<sup>Me</sup>)Ir(OH)<sub>3</sub>

E(SCF) = -1500.06044810485

|     |               |               |               |
|-----|---------------|---------------|---------------|
| Ir1 | -0.0126330858 | 0.0315089326  | 0.0225877422  |
| N2  | -0.0023344098 | -0.0579128201 | 2.1050925929  |
| C3  | 1.1716411932  | 0.0186587285  | 2.7908999238  |
| C4  | 1.1961289629  | -0.0477966664 | 4.1819340956  |
| C5  | 0.0013516362  | -0.1614984986 | 4.8879831396  |
| C6  | -1.1953368989 | -0.2215094752 | 4.1780061628  |
| C7  | -1.1761679812 | -0.1836551770 | 2.7857060468  |
| H8  | 2.1482872005  | 0.0083491412  | 4.6989968790  |
| H9  | 0.0025907835  | -0.2023575388 | 5.9729486417  |
| H10 | -2.1460551766 | -0.3157778798 | 4.6921494359  |
| C11 | 2.4162637023  | 0.2215361343  | 1.9686156116  |
| H12 | 2.4846579431  | 1.2922044609  | 1.7304932881  |
| H13 | 3.3161728558  | -0.0884579332 | 2.5090159323  |
| C14 | -2.4281681614 | -0.3253060733 | 1.9584312329  |
| H15 | -2.4992664292 | -1.3762043613 | 1.6460359405  |
| H16 | -3.3226148781 | -0.0544596872 | 2.5280465558  |
| P17 | 2.2120199879  | -0.5334347348 | 0.2867067925  |
| P18 | -2.2292117982 | 0.5479431696  | 0.3351147396  |
| C19 | -3.5215927762 | -0.1662841933 | -0.7370837262 |
| H20 | -3.2746937994 | -1.2227625111 | -0.8656375607 |
| H21 | -4.5279543298 | -0.0565529272 | -0.3213188247 |
| H22 | -3.4726387469 | 0.3220480254  | -1.7139589660 |
| C23 | -2.6622045199 | 2.3083819663  | 0.5897028958  |
| H24 | -2.7995275865 | 2.7773777171  | -0.3893390101 |
| H25 | -3.5698057393 | 2.4501246193  | 1.1841687743  |
| H26 | -1.8019772904 | 2.7868054475  | 1.0664377753  |
| C27 | 2.6087864065  | -2.3159340164 | 0.4186618291  |
| H28 | 1.7144894685  | -2.8105634547 | 0.8084102902  |
| H29 | 2.7885562539  | -2.7117280912 | -0.5856963691 |
| H30 | 3.4814112592  | -2.5231048025 | 1.0452198374  |
| C31 | 3.5628549243  | 0.2389758102  | -0.6800886440 |
| H32 | 3.5932838741  | -0.1969669310 | -1.6831311467 |
| H33 | 3.3197816337  | 1.3017555033  | -0.7623428753 |
| H34 | 4.5438117669  | 0.1136316958  | -0.2108239846 |
| O35 | 0.6950379721  | 2.0095485839  | 0.1196561408  |
| H37 | 0.5281656982  | 2.3226163242  | -0.7811067791 |
| O39 | -0.7060728307 | -1.9462585483 | -0.0615140599 |
| H40 | -0.7444146978 | -2.0666435590 | -1.0227678328 |
| O41 | -0.1843639084 | 0.1268468101  | -2.0081190737 |
| H42 | 0.6985946254  | 0.2197326086  | -2.3847872637 |

Electronic Supplementary Information for Dalton Transactions  
This journal is © The Royal Society of Chemistry 2010

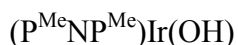

E(SCF) = -1348.40794648830

|     |               |               |               |
|-----|---------------|---------------|---------------|
| Ir1 | 0.0082607154  | 0.0469717365  | 0.0216603284  |
| N2  | -0.0151885771 | -0.0078268787 | 2.0731270374  |
| C3  | 1.1544356322  | -0.0910022861 | 2.8041533684  |
| C4  | 1.1573013848  | -0.1064230389 | 4.1927879493  |
| C5  | -0.0389615366 | -0.0735436996 | 4.9076225173  |
| C6  | -1.2235692179 | -0.0072018018 | 4.1760644041  |
| C7  | -1.1952825557 | 0.0410576736  | 2.7887734848  |
| H8  | 2.1106906487  | -0.1667231080 | 4.7090664011  |
| H9  | -0.0475363076 | -0.0983913005 | 5.9921799786  |
| H10 | -2.1856492244 | 0.0292789019  | 4.6782528309  |
| C11 | 2.4442288033  | -0.2291115116 | 2.0298884566  |
| H12 | 3.2828404749  | 0.2109672907  | 2.5807878400  |
| H13 | 2.6649253934  | -1.2981345951 | 1.8993739805  |
| C14 | -2.4637016283 | 0.2079041689  | 1.9907570734  |
| H15 | -3.3179207600 | -0.2499557517 | 2.5018043524  |
| H16 | -2.6787436435 | 1.2805959531  | 1.8851364330  |
| P17 | 2.2352183241  | 0.4305138412  | 0.3110226050  |
| P18 | -2.2079550317 | -0.3969687124 | 0.2565437416  |
| C19 | -2.7741425168 | -2.1521152152 | 0.2903939903  |
| H20 | -2.1254092231 | -2.7162523698 | 0.9649707208  |
| H21 | -3.8155915595 | -2.2492616698 | 0.6173579885  |
| H22 | -2.6708362011 | -2.5825086031 | -0.7098861713 |
| C23 | -3.5735163814 | 0.4166136051  | -0.6793952968 |
| H24 | -3.5557264399 | 0.0685380996  | -1.7169515125 |
| H25 | -4.5585267014 | 0.1934282883  | -0.2551567601 |
| H26 | -3.4140423347 | 1.4978830584  | -0.6827167085 |
| C27 | 3.5194264796  | -0.4230050860 | -0.6857491011 |
| H28 | 3.3329493643  | -1.4996017315 | -0.6647844754 |
| H29 | 3.4173495076  | -0.0878980948 | -1.7217835504 |
| H30 | 4.5357581257  | -0.2153184575 | -0.3339652709 |
| C31 | 2.8678173923  | 2.1587724562  | 0.3771814400  |
| H32 | 2.7713225347  | 2.6048588510  | -0.6168385971 |
| H33 | 2.2490658425  | 2.7377461953  | 1.0675020830  |
| H34 | 3.9155779319  | 2.2078808725  | 0.6942073679  |
| O35 | 0.2061610776  | 0.1337973811  | -1.9727685150 |
| H36 | -0.6580280762 | 0.1399383181  | -2.3993156482 |
